# Supplementary material for: Mortality inequalities by occupational class among men in Japan, South Korea and eight European countries: a national register-based study, 1990–2015
Source: PubMed Central journal article supplement (PMC6678055; doi:10.1136/jech-2018-211715), 2019-05-29
Supplement: jech-2018-211715supp001.pdf [file jech-2018-211715supp001.pdf]

## **Supplementary File**

*Tanaka, H. et al. Mortality inequalities by occupational class among men in Japan, South Korea, and 8 European countries: a national register-based study, 1990-2015*

### **Contents:**

**Appendix 1** – Overview of data sources and mortality aged 35-64 men (page 2-5)

**Appendix 2** – Definition of occupational class (page 6-10)

**Appendix 3** – A procedure for adjusting estimates of occupational mortality differences for the exclusion of economically inactive men (page 11-13)

**Appendix 4** – Age-standardized mortality rate (ASMR) by occupational class (page 14-31)

**Appendix 5** – Sensitivity analysis using an indirect estimation of mortality among the self-employed in Japan and South Korea (page 32-34)

## **Appendix 1 – Overview of data sources and mortality aged 35-64 men**

This appendix provides the descriptive statistics of data sources and mortality rate aged 35-64 men. Appendix Table 1-1 shows the overview of data sources and years covered by the analysis. Appendix Table 1-2 shows the distribution of person-years and deaths by occupational class, men aged 35-64. Cause-specific death was mainly defined as 4 types of broad cause-specific death according to International Statistical Classification of Diseases (ICD); all cancer (C00-D48), cardiovascular disease (I00-I99), external causes (V01-Y98), and other causes. Appendix Table 1-3 shows international statistical classification of diseases (ICD) codes “for the cause specific deaths.

Age-standardized all-cause mortality rate (ASMR) among men aged 35-64 by occupational class were computed per 100,000 person-years and directly standardized with the 2013 European standard population with data based on a 5-year age interval. Appendix Figure 1-1 shows trends in age-standardized all-cause mortality rate among the whole male population aged 35-64 years by countries.

**Appendix Table 1-1. Overview of sources of mortality data**

| Population            | Type of dataset                  | Observation period (Census year) |                     |                     |                     |                                  |                | Geographic coverage     | Demographic coverage     |
|-----------------------|----------------------------------|----------------------------------|---------------------|---------------------|---------------------|----------------------------------|----------------|-------------------------|--------------------------|
|                       |                                  | 1990-1994                        | 1995-1999           | 2000-2004           | 2005-2009           | 2010-2014                        | 2015           |                         |                          |
| <b>North Europe</b>   |                                  |                                  |                     |                     |                     |                                  |                |                         |                          |
| Finland               | Longitudinal, census linked      | 1990-1995<br>(1990)              | 1995-2000           | 2000-2005<br>(2000) | 2005-2010           | 2010-2014 <sup>§</sup><br>(2010) | -              | National                | Whole population         |
| Denmark               | Longitudinal                     | -                                | 1995-1999<br>(1995) | 2000-2004<br>(2000) | 2005-2009<br>(2005) | 2010-2014<br>(2010)              | -              | National                | Whole population         |
| <b>West Europe</b>    |                                  |                                  |                     |                     |                     |                                  |                |                         |                          |
| England/Wales         | Longitudinal, census linked      | 1991-1996<br>(1991)              | 1996-2001           | 2001-2006<br>(2001) | 2006-2011           | 2011-2013<br>(2011)              | -              | National                | 1% representative sample |
| France                | Longitudinal, census linked      | 1990-1995<br>(1990)              | 1995-1999           | 1999-2004<br>(1999) | 2004-2007           | -                                | -              | French-born in mainland | 1% representative sample |
| Switzerland           | Longitudinal, census linked      | 1990-1995<br>(1990)              | 1995-2000           | 2000-2005<br>(2000) | 2005-2010           | 2010-2014<br>(2010)              | -              | National                | Swiss nationals          |
| <b>South Europe</b>   |                                  |                                  |                     |                     |                     |                                  |                |                         |                          |
| Italy(Turin)          | Longitudinal, census linked      | 1991-1996<br>(1991)              | 1996-2001           | 2001-2006<br>(2001) | 2006-2010           | -                                | -              | City                    | Whole population         |
| <b>Baltic country</b> |                                  |                                  |                     |                     |                     |                                  |                |                         |                          |
| Estonia               | Longitudinal, census linked      | -                                | -                   | 2001-2006<br>(2001) | 2006-2011           | 2012-2015<br>(2011)              | -              | National                | Whole population         |
| Lithuania             | Longitudinal, census linked      | -                                | -                   | 2001-2005<br>(2001) | 2005-2009           | 2011-2014<br>(2011)              | -              | National                | Whole population         |
| <b>Asia</b>           |                                  |                                  |                     |                     |                     |                                  |                |                         |                          |
| Japan*                | Cross-sectional, census unlinked | 1990 <sup>†</sup><br>(1990)      | 1995<br>(1995)      | 2000<br>(2000)      | 2005<br>(2005)      | 2010<br>(2010)                   | 2015<br>(2015) | National                | Japanese nationals       |
| South Korea*          | Cross-sectional, census unlinked | 1990 <sup>†</sup><br>(1990)      | 1997<br>(1995)      | 2000<br>(2000)      | 2005<br>(2005)      | 2010<br>(2010)                   | 2015<br>(2015) | National                | South Korea nationals    |

\* The national census was conducted every 5 years on 1 October in Japan and on 1 November in South Korea, respectively.

† All-cause of death only

§ 80% representative sample

**Appendix Table 1-2. Distribution of person-years and number of deaths by occupational class, men aged 35-64**

|               |                           | 1990-1994                 |                           | 1995-1999                 |                           | 2000-2004    |        | 2005-2009    |        | 2010-2014                 |                           | 2015         |                           |
|---------------|---------------------------|---------------------------|---------------------------|---------------------------|---------------------------|--------------|--------|--------------|--------|---------------------------|---------------------------|--------------|---------------------------|
|               |                           | Person-years              | Deaths                    | Person-years              | Deaths                    | Person-years | Deaths | Person-years | Deaths | Person-years              | Deaths                    | Person-years | Deaths                    |
| Finland       | Upper non-manual          | 818206                    | 2925                      | 819351                    | 2907                      | 963414       | 3132   | 915425       | 3110   | 881923                    | 2177                      | -            | -                         |
|               | Lower non-manual          | 871407                    | 4586                      | 857155                    | 4442                      | 1037365      | 4884   | 984131       | 4824   | 854377                    | 3582                      | -            | -                         |
|               | Manual                    | 2337154                   | 20882                     | 2203329                   | 19311                     | 2469452      | 19423  | 2282735      | 19211  | 1791177                   | 12899                     | -            | <i>Data not available</i> |
|               | Farmers                   | 434791                    | 3333                      | 359689                    | 2565                      | 311787       | 1917   | 260978       | 1666   | 159648                    | 950                       | -            | -                         |
|               | Self-employed             | 477029                    | 2759                      | 450461                    | 2563                      | 540128       | 2748   | 487098       | 2904   | 470014                    | 2139                      | -            | -                         |
|               | Inactive or class unknown | 67116                     | 875                       | 73230                     | 795                       | 163575       | 1440   | 178173       | 1574   | 182989                    | 1566                      | -            | -                         |
| Denmark       | Upper non-manual          | -                         | -                         | 1388237                   | 3396                      | 1446184      | 3015   | 1531016      | 2911   | 1698368                   | 2735                      | -            | -                         |
|               | Lower non-manual          | -                         | -                         | 402844                    | 1272                      | 349068       | 1010   | 366098       | 934    | 541308                    | 1428                      | -            | -                         |
|               | Manual                    | <i>Data not available</i> | <i>Data not available</i> | 1657350                   | 5727                      | 2093399      | 6610   | 1458143      | 4330   | 1777331                   | 4524                      | -            | <i>Data not available</i> |
|               | Farmers                   | -                         | -                         | 59446                     | 177                       | 35737        | 88     | 22425        | 65     | 24183                     | 62                        | -            | -                         |
|               | Self-employed             | -                         | -                         | 504860                    | 1795                      | 503163       | 1580   | 505948       | 1307   | 387802                    | 755                       | -            | -                         |
|               | Inactive or class unknown | -                         | -                         | 1171106                   | 19937                     | 1134687      | 19262  | 1843199      | 21110  | 1245851                   | 16722                     | -            | -                         |
| England/Wales | Upper non-manual          | 32973                     | 130                       | 32858                     | 100                       | 206070       | 639    | 198872       | 569    | 118741                    | 272                       | -            | -                         |
|               | Lower non-manual          | 188594                    | 810                       | 183910                    | 759                       | 26561        | 92     | 25966        | 102    | 19770                     | 57                        | -            | -                         |
|               | Manual                    | 250157                    | 1651                      | 237521                    | 1467                      | 197045       | 1144   | 181146       | 952    | 106766                    | 451                       | -            | <i>Data not available</i> |
|               | Farmers                   | -                         | -                         | -                         | -                         | -            | -      | -            | -      | -                         | -                         | -            | -                         |
|               | Self-employed             | -                         | -                         | -                         | -                         | 80787        | 349    | 71786        | 296    | 52879                     | 160                       | -            | -                         |
|               | Inactive or class unknown | 15014                     | 183                       | 14780                     | 167                       | 18000        | 161    | 17651        | 143    | 15169                     | 111                       | -            | -                         |
| France        | Upper non-manual          | 153762                    | 566                       | 122834                    | 476                       | 178225       | 546    | 140101       | 513    | -                         | -                         | -            | -                         |
|               | Lower non-manual          | 43070                     | 328                       | 33092                     | 222                       | 53632        | 335    | 41593        | 235    | -                         | -                         | -            | -                         |
|               | Manual                    | 148714                    | 1153                      | 118189                    | 941                       | 158180       | 985    | 125904       | 753    | <i>Data not available</i> | <i>Data not available</i> | -            | -                         |
|               | Farmers                   | 45346                     | 205                       | 33670                     | 191                       | 45632        | 176    | 33656        | 139    | -                         | -                         | -            | -                         |
|               | Self-employed             | 27342                     | 147                       | 17791                     | 101                       | 20266        | 84     | 14442        | 62     | -                         | -                         | -            | -                         |
|               | Inactive or class unknown | 20546                     | 480                       | 13337                     | 310                       | 31461        | 560    | 21168        | 349    | -                         | -                         | -            | -                         |
| Switzerland   | Upper non-manual          | 2250925                   | 7447                      | 2189646                   | 7866                      | 2146281      | 4485   | 2089066      | 5120   | 1687463                   | 3790                      | -            | -                         |
|               | Lower non-manual          | 698427                    | 3561                      | 685911                    | 3669                      | 554922       | 1738   | 551209       | 1861   | 531156                    | 1550                      | -            | -                         |
|               | Manual                    | 802439                    | 5398                      | 748964                    | 5117                      | 754420       | 3053   | 726046       | 3281   | 709737                    | 2695                      | -            | <i>Data not available</i> |
|               | Farmers                   | 258816                    | 1111                      | 232840                    | 1077                      | 214443       | 650    | 198254       | 660    | 157153                    | 518                       | -            | -                         |
|               | Self-employed             | 598998                    | 2897                      | 556906                    | 2833                      | 629855       | 2098   | 573368       | 2116   | 420364                    | 1496                      | -            | -                         |
|               | Inactive or class unknown | 303089                    | 5954                      | 225461                    | 3027                      | 1249757      | 11547  | 1020064      | 8093   | 951142                    | 5513                      | -            | -                         |
| Italy(Turin)  | Upper non-manual          | 151194                    | 476                       | 126670                    | 418                       | 179587       | 413    | 128123       | 336    | -                         | -                         | -            | -                         |
|               | Lower non-manual          | 175722                    | 767                       | 153050                    | 575                       | 155726       | 483    | 111898       | 331    | -                         | -                         | -            | -                         |
|               | Manual                    | 394583                    | 2504                      | 308718                    | 1842                      | 296295       | 1368   | 203911       | 863    | <i>Data not available</i> | <i>Data not available</i> | -            | -                         |
|               | Farmers                   | -                         | -                         | -                         | -                         | 2056         | 11     | 1321         | 9      | -                         | -                         | -            | -                         |
|               | Self-employed             | 148845                    | 771                       | 119075                    | 640                       | 135321       | 493    | 90873        | 378    | -                         | -                         | -            | -                         |
|               | Inactive or class unknown | 40355                     | 649                       | 25147                     | 297                       | 63109        | 507    | 44101        | 349    | -                         | -                         | -            | -                         |
| Estonia       | Upper non-manual          | -                         | -                         | -                         | -                         | 326235       | 1441   | 321468       | 1548   | 270562                    | 678                       | -            | -                         |
|               | Lower non-manual          | -                         | -                         | -                         | -                         | 60421        | 329    | 62719        | 466    | 55215                     | 217                       | -            | -                         |
|               | Manual                    | <i>Data not available</i> | <i>Data not available</i> | <i>Data not available</i> | <i>Data not available</i> | 443518       | 3360   | 414477       | 3931   | 294486                    | 1398                      | -            | <i>Data not available</i> |
|               | Farmers                   | -                         | -                         | -                         | -                         | 118743       | 1338   | 102733       | 1226   | 52954                     | 383                       | -            | -                         |
|               | Self-employed             | -                         | -                         | -                         | -                         | -            | -      | -            | -      | -                         | -                         | -            | -                         |
|               | Inactive or class unknown | -                         | -                         | -                         | -                         | 414813       | 11538  | 313183       | 7150   | 299088                    | 5633                      | -            | -                         |
| Lithuania     | Upper non-manual          | -                         | -                         | -                         | -                         | 399955       | 1571   | 339200       | 1697   | 406915                    | 1296                      | -            | -                         |
|               | Lower non-manual          | -                         | -                         | -                         | -                         | 106520       | 478    | 101951       | 519    | 120413                    | 496                       | -            | -                         |
|               | Manual                    | <i>Data not available</i> | <i>Data not available</i> | <i>Data not available</i> | <i>Data not available</i> | 869923       | 6027   | 722667       | 6879   | 661278                    | 3711                      | -            | <i>Data not available</i> |
|               | Farmers                   | -                         | -                         | -                         | -                         | 92640        | 1184   | 73838        | 1207   | 28288                     | 195                       | -            | -                         |
|               | Self-employed             | -                         | -                         | -                         | -                         | 317142       | 2926   | 266083       | 3045   | 177685                    | 716                       | -            | -                         |
|               | Inactive or class unknown | -                         | -                         | -                         | -                         | 1166075      | 28167  | 828386       | 22202  | 812394                    | 21284                     | -            | -                         |
| Japan         | Upper non-manual          | 4181083                   | 11397                     | 4561911                   | 11521                     | 4137684      | 14901  | 3783755      | 11414  | 3857965                   | 9236                      | 3978555      | 6510                      |
|               | Lower non-manual          | 7014302                   | 22158                     | 7240800                   | 20504                     | 7547904      | 17761  | 7482713      | 13779  | 7293419                   | 10968                     | 7035741      | 8310                      |
|               | Manual                    | 9960732                   | 23510                     | 9677262                   | 21815                     | 9126617      | 15387  | 8865972      | 13009  | 8105406                   | 11293                     | 7708286      | 9473                      |
|               | Farmers                   | 1456445                   | 9570                      | 1089070                   | 6891                      | 801737       | 4593   | 717228       | 3445   | 650675                    | 2935                      | 549320       | 1945                      |
|               | Self-employed             | -                         | -                         | -                         | -                         | -            | -      | -            | -      | -                         | -                         | -            | -                         |
|               | Inactive or class unknown | 2047748                   | 57106                     | 2276364                   | 63237                     | 2921203      | 67896  | 4313701      | 74867  | 5841310                   | 74886                     | 5532195      | 59102                     |
| South Korea   | Upper non-manual          | 602552                    | 1180                      | 1702210                   | 3618                      | 1845991      | 3747   | 1890626      | 3597   | 1921042                   | 4381                      | 1966422      | 5470                      |
|               | Lower non-manual          | 1938826                   | 10349                     | 1557672                   | 11114                     | 1851810      | 10092  | 2294428      | 9995   | 2686796                   | 9503                      | 3189323      | 7818                      |
|               | Manual                    | 1760799                   | 8481                      | 2439444                   | 12387                     | 2656940      | 8778   | 3037999      | 6668   | 3682534                   | 6451                      | 4301190      | 9173                      |
|               | Farmers                   | 1204764                   | 19006                     | 994586                    | 14389                     | 807825       | 11508  | 640889       | 6542   | 494120                    | 3850                      | 388094       | 3049                      |
|               | Self-employed             | -                         | -                         | -                         | -                         | -            | -      | -            | -      | -                         | -                         | -            | -                         |
|               | Inactive or class unknown | 794792                    | 21197                     | 856899                    | 17845                     | 1428226      | 23734  | 1676234      | 24259  | 1670055                   | 24734                     | 1729868      | 19974                     |

**Appendix Table 1-3. International Statistical Classification of Diseases (ICD) codes for the cause-specific death**

| Cause of death                    | ICD-10                             |                                                                  |
|-----------------------------------|------------------------------------|------------------------------------------------------------------|
|                                   | European countries and South Korea | Japan                                                            |
| <b>Broad cause-specific death</b> |                                    |                                                                  |
| All Cancer                        | C00-D48                            | C00-C97                                                          |
| Cardiovascular disease            | I00-I99                            | I01-I02.0, I10-I13, I05-I09, I20-I25, I27, I30-I51, I60-I69, I71 |
| External causes                   | V01-Y98                            | V01-X84                                                          |
| Other causes                      | Others disease                     | Others disease                                                   |
| <b>Cause-specific death</b>       |                                    |                                                                  |
| Stomach cancer                    | C16                                | C16                                                              |
| Liver cancer                      | C22                                | C22                                                              |
| Colorectal cancer                 | C18-C21                            | C18-C20                                                          |
| Ischemic heart diseases           | I20-I25                            | I20-I25                                                          |
| Cerebrovascular diseases          | I60-I69                            | I60-I69                                                          |
| Smoking related causes            | C32-34, J40-44, J47                | C33-34, J41-44                                                   |
| Suicide                           | X60-X84, Y87.0                     | X60-X84                                                          |
| Road traffic accidents            | V01-V89, Y85                       | V01-V98                                                          |

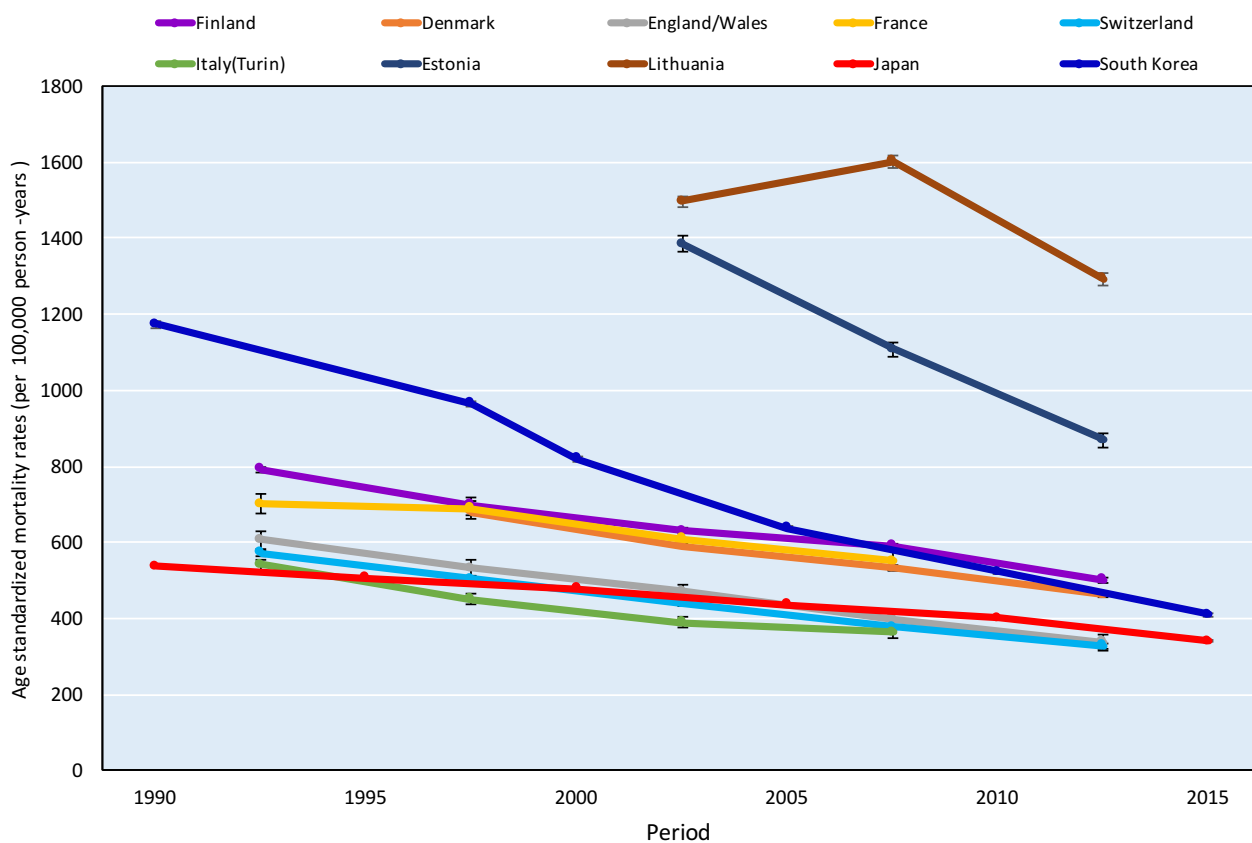

**Appendix Figure 1-1. Trends in age-standardized all-cause mortality rate among the whole male population aged 35-64 years**

## Appendix 2 – Definition of occupational class

We categorized occupational class into five categories: upper non-manual workers (e.g. professionals, managers), lower non-manual workers (e.g. clerical, service, sales workers), manual workers (e.g. craft and related trades workers, semi-skilled and unskilled manual workers), farmers and self-employed. These occupational classes were defined following the Erikson-Goldthorpe-Portocarero (EGP) scheme which was specifically developed for international comparisons. In some countries (Finland, France Switzerland, and Italy(Turin)), data were pre-harmonized by applying the EGP scheme to national data on mortality by occupation before supplying the harmonized data to the coordinating center. For other countries (Denmark, England, Estonia, Lithuania, Japan, and South Korea), detailed data on mortality by occupation that were not yet classified according to the EGP scheme were sent to the coordinating center and post-harmonized there. Occupations in European countries were originally classified according to the International Standard Classification of Occupations (ISCO), whereas occupations in Japan and South Korea were originally classified according to the Japanese Standard Occupational Classification (JSOC) and the Korean Standard Classification of Occupations (KSCO), respectively.

Appendix Table 2-1 shows the definitions of the occupational classes used in our analysis according to ISCO, JSOC and KSCO. Appendix Table 2-2 provides the distribution of occupational classes by level of education in each of the participating countries. Appendix Table 2-3 shows percentages of self-employed by occupational class from the population census in Japan and South Korea. Because self-employed was lacking in Japan, and South Korea (and Estonia), we conducted sensitivity analysis using an indirect estimation of mortality among the self-employed in Japan and South Korea (using Appendix Table 2-3). The sensitivity analysis is presented in Appendix 5. We need to interpret with caution, especially comparison between European countries and Japan, South Korea because Japanese Standard Occupational Classification (JSOC: <https://unstats.un.org/unsd/cr/ctryreg/ctrydetail.asp?id=1155>) and Korean Standard Classification of Occupations (KSCO: <https://unstats.un.org/unsd/cr/ctryreg/ctrydetail.asp?id=1160>) do not directly correspond to International Standard Classification of Occupations (ISCO: <http://www.ilo.org/public/english/bureau/stat/isco/>).

**Appendix Table 2-1. Definitions of occupational class**

| Classification in this study | European countries                                                           | Japan                                                                              | South Korea                                          | Correspondence to the Erikson-Goldthorpe-Portocarero (EGP) scheme                                                           |
|------------------------------|------------------------------------------------------------------------------|------------------------------------------------------------------------------------|------------------------------------------------------|-----------------------------------------------------------------------------------------------------------------------------|
|                              | International Standard Classification of Occupations (ISCO)                  | Japanese Standard Occupational Classification (JSOC)                               | Korean Standard Classification of Occupations (KSCO) |                                                                                                                             |
| Upper non-manual workers     | 1. Legislators, senior officials and managers                                | (A) Administrative and managerial workers                                          | KSCO1: legislators, senior officials and managers    | I: Higher-grade professionals, administrators and officials; managers in large industrial establishments; large proprietors |
|                              | 2. Professionals                                                             | (B) Professional and engineering workers                                           | KSCO2: professionals                                 |                                                                                                                             |
|                              | 3. Technicians and associate professionals                                   |                                                                                    | KSCO3: technicians and associate professionals       |                                                                                                                             |
| Lower non-manual workers     | 4. Clerks                                                                    | (C) Clerical workers                                                               | KSCO4: clerks                                        | III: Routine non-manual employees in administration and commerce; sales personnel; other rank-and-file service workers      |
|                              | 5. Service workers and shop and market sales workers                         | (D) Sales workers                                                                  | KSCO5: service workers and sale workers              |                                                                                                                             |
|                              |                                                                              | (E) Service workers                                                                |                                                      |                                                                                                                             |
| Manual workers               | 7. Craft and related trades workers                                          | (H) Manufacturing process workers                                                  | KSCO7: craft and related trades workers              | V/VI: Lower-grade technicians; supervisors of manual workers; skilled manual workers                                        |
|                              | 8. Plant and machine operators and assemblers                                | (I) Transport and machine operating workers<br>(J) Construction and mining workers | KSCO8: plant and machine operators and assemblers    |                                                                                                                             |
|                              | 9. Elementary occupations                                                    | (K) Carrying, cleaning, packaging, and related workers                             | KSCO9: elementary occupations                        |                                                                                                                             |
| Farmers                      | 6. Skilled agricultural and fishery workers                                  | (G) Agriculture forestry and fishery workers                                       | KSCO6: agricultural, forestry and fishery workers    | IVc: Farmers and smallholders; self-employed fishermen<br>VIIb: Agricultural workers                                        |
| Self-employed                | Self-employed with employees, self-employed no employees (employment status) | -                                                                                  | -                                                    | IVa: Small proprietors; artisans, etc., with employees<br>IVb: Small proprietors, artisans, etc., without employees         |

**Appendix Table 2-2. Percentages of educational level by occupational class (% , population census)**

| Educational level    | 1990-1999                 |                    |                  | 2000-2009                 |                    |                  | 2010-2014                 |                    |                  |
|----------------------|---------------------------|--------------------|------------------|---------------------------|--------------------|------------------|---------------------------|--------------------|------------------|
|                      | Low (ISCES 0-2)           | Middle (ISCED 3-4) | High (ISCED 5-6) | Low (ISCES 0-2)           | Middle (ISCED 3-4) | High (ISCED 5-6) | Low (ISCES 0-2)           | Middle (ISCED 3-4) | High (ISCED 5-6) |
| <b>Finland</b>       | 1990 (men aged 35-64)     |                    |                  | 2000 (men aged 35-64)     |                    |                  | 2010 (men aged 35-64)     |                    |                  |
| Upper non-manual     | 9                         | 12                 | 79               | 7                         | 13                 | 81               | 5                         | 14                 | 81               |
| Lower non-manual     | 30                        | 30                 | 40               | 20                        | 33                 | 47               | 14                        | 37                 | 48               |
| Manual               | 59                        | 40                 | 2                | 42                        | 54                 | 4                | 32                        | 62                 | 6                |
| Farmers              | 64                        | 31                 | 5                | 46                        | 46                 | 8                | 32                        | 55                 | 13               |
| Self-employed        | 48                        | 31                 | 20               | 35                        | 40                 | 25               | 26                        | 46                 | 28               |
| <b>Denmark</b>       |                           |                    |                  | 2000 (men aged 35-64)     |                    |                  | 2010 (men aged 35-64)     |                    |                  |
| Upper non-manual     | -                         | -                  | -                | 8                         | 34                 | 58               | 6                         | 32                 | 62               |
| Lower non-manual     | -                         | -                  | -                | 23                        | 59                 | 18               | 21                        | 61                 | 18               |
| Manual               | -                         | -                  | -                | 34                        | 58                 | 7                | 29                        | 62                 | 9                |
| Farmers              | -                         | -                  | -                | 32                        | 60                 | 8                | 20                        | 74                 | 6                |
| Self-employed        | -                         | -                  | -                | 26                        | 54                 | 20               | 20                        | 56                 | 25               |
| <b>England/Wales</b> | 1991 (men aged 35-64)     |                    |                  | 2001 (men aged 35-64)     |                    |                  | 2011 (men aged 35-64)     |                    |                  |
| Upper non-manual     | 18                        | -                  | 82               | 25                        | 29                 | 46               | 13                        | 22                 | 65               |
| Lower non-manual     | 66                        | -                  | 34               | 45                        | 37                 | 18               | 30                        | 39                 | 32               |
| Manual               | 97                        | -                  | 3                | 77                        | 18                 | 5                | 59                        | 30                 | 11               |
| Farmers              | -                         | -                  | -                | -                         | -                  | -                | -                         | -                  | -                |
| Self-employed        | -                         | -                  | -                | 66                        | 23                 | 11               | 47                        | 32                 | 21               |
| <b>France</b>        | <i>Data not available</i> |                    |                  | <i>Data not available</i> |                    |                  | <i>Data not available</i> |                    |                  |
| <b>Switzerland</b>   | 1990 (men aged 35-64)     |                    |                  | 2000 (men aged 35-64)     |                    |                  | 2010 (men aged 35-64)     |                    |                  |
| Upper non-manual     | 4                         | 49                 | 47               | 3                         | 38                 | 60               | 2                         | 35                 | 62               |
| Lower non-manual     | 11                        | 86                 | 3                | 1                         | 93                 | 7                | 1                         | 94                 | 5                |
| Manual               | 44                        | 56                 | 0                | 34                        | 66                 | 0                | 30                        | 70                 | 0                |
| Farmers              | 34                        | 66                 | 0                | 38                        | 62                 | 0                | 28                        | 72                 | 0                |
| Self-employed        | 9                         | 64                 | 27               | 7                         | 61                 | 32               | 7                         | 62                 | 31               |



**Appendix Table 2-2. Continued**

|                   | 1990-1999             |                       |                     | 2000-2009             |                       |                     | 2010-2014             |                       |                     |
|-------------------|-----------------------|-----------------------|---------------------|-----------------------|-----------------------|---------------------|-----------------------|-----------------------|---------------------|
| Educational level | Low<br>(ISCES 0-2)    | Middle<br>(ISCED 3-4) | High<br>(ISCED 5-6) | Low<br>(ISCES 0-2)    | Middle<br>(ISCED 3-4) | High<br>(ISCED 5-6) | Low<br>(ISCES 0-2)    | Middle<br>(ISCED 3-4) | High<br>(ISCED 5-6) |
| Italy(Turin)      | 1991 (men aged 35-64) |                       |                     | 2001 (men aged 35-64) |                       |                     |                       |                       |                     |
| Upper non-manual  | 8                     | 45                    | 47                  | 12                    | 32                    | 56                  | -                     | -                     | -                   |
| Lower non-manual  | 36                    | 51                    | 12                  | 23                    | 66                    | 11                  | -                     | -                     | -                   |
| Manual            | 94                    | 5                     | 0.5                 | 80                    | 20                    | 1                   | -                     | -                     | -                   |
| Farmers           | -                     | -                     | -                   | 75                    | 24                    | 1                   | -                     | -                     | -                   |
| Self-employed     | 80                    | 18                    | 3                   | 63                    | 30                    | 7                   | -                     | -                     | -                   |
| Estonia           |                       |                       |                     | 2001 (men aged 35-64) |                       |                     | 2011 (men aged 35-64) |                       |                     |
| Upper non-manual  | -                     | -                     | -                   | 2                     | 44                    | 54                  | 3                     | 43                    | 54                  |
| Lower non-manual  | -                     | -                     | -                   | 10                    | 76                    | 14                  | 9                     | 73                    | 19                  |
| Manual            | -                     | -                     | -                   | 24                    | 72                    | 4                   | 18                    | 77                    | 5                   |
| Farmers           | -                     | -                     | -                   | 33                    | 60                    | 7                   | 23                    | 68                    | 9                   |
| Self-employed     | -                     | -                     | -                   | -                     | -                     | -                   | -                     | -                     | -                   |
| Lithuania         |                       |                       |                     | 2001 (men aged 35-64) |                       |                     | 2011 (men aged 35-64) |                       |                     |
| Upper non-manual  | -                     | -                     | -                   | 0.2                   | 31                    | 69                  | 2                     | 37                    | 61                  |
| Lower non-manual  | -                     | -                     | -                   | 5                     | 82                    | 14                  | 7                     | 81                    | 12                  |
| Manual            | -                     | -                     | -                   | 17                    | 79                    | 4                   | 14                    | 82                    | 4                   |
| Farmers           | -                     | -                     | -                   | 30                    | 66                    | 4                   | 14                    | 75                    | 11                  |
| Self-employed     | -                     | -                     | -                   | 16                    | 62                    | 22                  | 6                     | 59                    | 35                  |
| Japan             | 1990 (men aged 35-64) |                       |                     | 2000 (men aged 35-64) |                       |                     | 2010 (men aged 35-64) |                       |                     |
| Upper non-manual  | 8                     | 35                    | 58                  | 4                     | 30                    | 66                  | 2                     | 22                    | 77                  |
| Lower non-manual  | 15                    | 52                    | 33                  | 9                     | 48                    | 44                  | 4                     | 41                    | 56                  |
| Manual            | 47                    | 46                    | 8                   | 32                    | 55                    | 13                  | 17                    | 61                    | 21                  |
| Farmers           | 62                    | 34                    | 4                   | 40                    | 50                    | 9                   | 20                    | 61                    | 19                  |
| Self-employed     | -                     | -                     | -                   | -                     | -                     | -                   | -                     | -                     | -                   |

**Appendix Table 2-2. Continued**

| Educational level | 1990-1999                   |                       |                     | 2000-2009                   |                       |                     | 2010-2014          |                       |                     |
|-------------------|-----------------------------|-----------------------|---------------------|-----------------------------|-----------------------|---------------------|--------------------|-----------------------|---------------------|
|                   | Low<br>(ISCES 0-2)          | Middle<br>(ISCED 3-4) | High<br>(ISCED 5-6) | Low<br>(ISCES 0-2)          | Middle<br>(ISCED 3-4) | High<br>(ISCED 5-6) | Low<br>(ISCES 0-2) | Middle<br>(ISCED 3-4) | High<br>(ISCED 5-6) |
| South Korea       | 1995 (men aged 15 and over) |                       |                     | 2005 (men aged 15 and over) |                       |                     |                    |                       |                     |
| Upper non-manual  | 4                           | 30                    | 66                  | 2                           | 18                    | 80                  | -                  | -                     | -                   |
| Lower non-manual  | 15                          | 53                    | 32                  | 7                           | 38                    | 55                  | -                  | -                     | -                   |
| Manual            | 33                          | 58                    | 9                   | 21                          | 57                    | 22                  | -                  | -                     | -                   |
| Farmers           | 72                          | 24                    | 4                   | 63                          | 28                    | 9                   | -                  | -                     | -                   |
| Self-employed     | -                           | -                     | -                   | -                           | -                     | -                   | -                  | -                     | -                   |

ISCED: International Standard Classification of Education

**Appendix Table 2-3. Percentages of self-employed by occupational class (%); data from population census**

|                  | Self-employed (%)      |      |      |      |      |      |
|------------------|------------------------|------|------|------|------|------|
|                  | 1990                   | 1995 | 2000 | 2005 | 2010 | 2015 |
| Japan            | (men aged 35-64)       |      |      |      |      |      |
| Upper non-manual | 12.2                   | 12.4 | 13.3 | 14.7 | 13.0 | 11.8 |
| Lower non-manual | 28.0                   | 17.3 | 14.4 | 13.3 | 8.8  | 7.1  |
| Manual           | 20.0                   | 16.8 | 16.2 | 15.9 | 13.1 | 11.9 |
| Farmers          | 80.1                   | 84.9 | 81.6 | 80.7 | 74.5 | 69.7 |
| Self-employed    | -                      | -    | -    | -    | -    | -    |
| South Korea      | (men aged 15 and over) |      |      |      |      |      |
| Upper non-manual | 5.5                    | 5.8  | 28.0 | 11.5 | 22.2 | 20.1 |
| Lower non-manual | 25.5                   | 29.2 | 37.2 | 23.7 | 32.6 | 28.2 |
| Manual           | 12.2                   | 15.5 | 23.7 | 20.9 | 26.7 | 26.0 |
| Farmers          | 94.6                   | 93.8 | 94.6 | 93.1 | 92.1 | 93.4 |
| Self-employed    | -                      | -    | -    | -    | -    | -    |

### Appendix 3 – A procedure for adjusting estimates of occupational mortality differences for the exclusion of economically inactive men

The last occupation is unknown of economically inactive men in most datasets. When these men are excluded from the calculation of mortality by occupational class, this may lead to bias because economically inactive men tend to have higher mortality than economically active men, and because men in lower occupational classes have a greater likelihood of being economically inactive than men in higher occupational classes. Therefore, we applied the procedure originally developed by Kunst et.al<sup>1,2</sup> to account for the exclusion of inactive men when computing occupational class differences in mortality. This algorithm was also applied by Toch-Marquardt et.al<sup>3</sup> on data that are also partly included in our analysis.

This algorithm aims to compute a “correction factor” that represents the extent to which the mortality rate among active men in each occupational class would have to be raised in order to correct for the exclusion of economically inactive men from that class. For occupational class  $z$ , the formula for the correction factor is:

$$1 + P_z^{inactive} * (RR_z^{inactive/active} - 1) \quad (A-3.1)$$

with  $P_z^{inactive}$  being the proportion of inactive men by occupational class, and  $RR_z^{inactive/active}$  being the mortality rate ratio of inactive compared to active men by occupational class.

These proportions and relative risks by occupational class are not available in most mortality dataset, but can be estimated using information from other datasets and some simplifying assumptions.

1. The proportion of inactive men by occupational class was estimated as follows:

$$P_z^{inactive} = M_z * P_{all}^{inactive} \quad (A-3.2)$$

This formula assumes that the proportion of inactive men in occupational class  $z$  is equal to some multiplication factor  $M$  times the national average proportion of inactive men. The latter is known in all mortality datasets, whereas the multiplication factor for each occupational class was computed from EuroStat,<sup>4</sup> the Japanese Population Census,<sup>5</sup> and the South Korean social survey.<sup>6</sup> Appendix Table 3-1 shows the multiplication factor ( $M_z$ ) by occupational class in all countries and time-periods. Here, the multiplication factor ( $M_z$ ) means that the proportion of inactive men in occupational class  $z$  is equal to  $M_z$  times the national average proportion of inactive men. Appendix Table 3-2 shows percentages of occupational class unknown ( $P_{all}^{inactive}$ ).

2. Under the simplifying assumption that there is no interaction between occupational class and activity status, the mortality rate ratio of inactive compared to active men for each occupational class can be estimated as follows:

$$RR_z^{inactive/active} = RR_{all}^{inactive/active} \quad (A-3.3)$$

The (age-adjusted) mortality rate ratio for inactive as compared to active men in the whole population could be computed in each mortality dataset. Substituting (A-3.2) and (A-3.3) into formula (A-3.1) then gives:

$$1 + M_z * P_{all}^{inactive} * (RR_{all}^{inactive/active} - 1) \quad (A-3.4)$$

The observed mortality rates in each occupational class were multiplied by the correction factor as estimated in formula (A-3.4) to derive mortality rates adjusted for the exclusion of economically inactive men.

Formula (A-3.4) can be extended to a formula for the comparison of relative inequality (class  $y$  to class  $z$ ), as follows:

$$\frac{1 + M_z * P_{all}^{inactive} * (RR_{all}^{inactive/active} - 1)}{1 + M_y * P_{all}^{inactive} * (RR_{all}^{inactive/active} - 1)} \quad (A-3.5)$$

Formula (A-3.5) was used as a correction factor for mortality rate ratios.

**Appendix Table 3-1. Multiplication factor ( $M_z$ )\* for the proportion of economically inactive men by occupational class (z)**

|             | Period    | Upper non-manual | Lower non-manual | Manual | Farmers | Self-employed |
|-------------|-----------|------------------|------------------|--------|---------|---------------|
| Denmark     | 1995-1999 | 0.70             | 0.98             | 1.38   | 1.50    | 0.10          |
|             | 2000-2004 | 0.73             | 1.17             | 1.27   | 2.20    | 0.09          |
|             | 2005-2009 | 0.67             | 1.02             | 1.39   | 2.10    | 0.11          |
|             | 2010-2014 | 0.65             | 0.85             | 1.41   | 2.58    | 0.10          |
| France      | 1990-1994 | 0.76             | 1.59             | 1.35   | 0.50    | 0.21          |
|             | 1995-1999 | 0.75             | 1.61             | 1.33   | 0.51    | 0.21          |
|             | 2000-2004 | 0.73             | 1.41             | 1.37   | 0.53    | 0.21          |
|             | 2005-2009 | 0.73             | 1.42             | 1.35   | 0.55    | 0.21          |
| Switzerland | 1990-1994 | 0.80             | 1.47             | 1.83   | 0.50    | 0.16          |
|             | 1995-1999 | 0.79             | 1.45             | 1.89   | 0.51    | 0.16          |
|             | 2000-2004 | 0.82             | 1.50             | 1.59   | 0.58    | 0.19          |
|             | 2005-2009 | 0.81             | 1.50             | 1.63   | 0.59    | 0.18          |
|             | 2010-2014 | 0.84             | 1.37             | 1.47   | 0.62    | 0.19          |
|             | 2000-2004 | 0.68             | 1.20             | 1.29   | 0.19    | -             |
|             | 2005-2009 | 0.65             | 1.15             | 1.33   | 0.18    | -             |
|             | 2010-2014 | 0.62             | 1.04             | 1.34   | 0.19    | -             |
| Lithuania   | 2000-2004 | 0.79             | 1.00             | 1.26   | 0.27    | 0.27          |
|             | 2005-2009 | 0.78             | 0.94             | 1.29   | 0.25    | 0.25          |
|             | 2010-2014 | 0.68             | 0.83             | 1.29   | 0.26    | 0.26          |
| Japan       | 1990      | 0.66             | 0.70             | 1.21   | 1.84    | -             |
|             | 1995      | 0.67             | 0.72             | 1.27   | 1.62    | -             |
|             | 2000      | 0.75             | 0.68             | 1.26   | 1.93    | -             |
|             | 2005      | 0.86             | 0.71             | 1.20   | 1.75    | -             |
|             | 2010      | 0.85             | 0.69             | 1.24   | 1.62    | -             |
| South Korea | 2015      | 0.85             | 0.78             | 1.21   | 1.55    | -             |
|             | 1990      | 1.01             | 0.92             | 1.22   | 0.78    | -             |
|             | 1997      | 0.65             | 1.46             | 1.12   | 0.46    | -             |
|             | 2000      | 0.66             | 1.31             | 1.10   | 0.62    | -             |
|             | 2005      | 0.70             | 1.19             | 1.06   | 0.82    | -             |
|             | 2010      | 0.76             | 1.15             | 0.99   | 1.12    | -             |
|             | 2015      | 0.82             | 1.10             | 0.96   | 1.50    | -             |

\*The proportion of economically inactive men by occupational class, estimated from EuroStat, the Japanese Population Census, and the South Korean social survey.

§ Assumption; relative ratio of the proportion of economically inactive for farmers and self-employed was assumed to equal to lower non-manual.

Occupational classification was defined by ISCO-88 (International Standard Classification of Occupations) in European countries aged 15-74;

Upper non-manual worker: Managers, Professionals, Technicians and associate professionals

Lower non-manual worker: Clerical support workers, Service and sales workers

Manual worker: Craft and related trades workers, Plant and machine operators and assemblers, Elementary occupations

Farmers: Skilled agricultural, forestry and fishery workers, Self-employed: None

**Appendix Table 3-2. Percentages of occupational class unknown among men aged 35-64 (%)**

|               | 1990-1994 | 1995-1999 | 2000-2004 | 2005-2009 | 2010-2014 | 2015 |
|---------------|-----------|-----------|-----------|-----------|-----------|------|
| Finland       | 1.3       | 1.5       | 3.0       | 3.5       | 4.2       | -    |
| Denmark*      | -         | 22.6      | 20.4      | 32.2      | 22.0      | -    |
| England/Wales | 3.1       | 3.2       | 3.4       | 3.6       | 4.8       | -    |
| France*       | 4.7       | 3.9       | 6.5       | 5.6       | -         | -    |
| Switzerland*  | 6.2       | 4.9       | 22.5      | 19.8      | 21.3      | -    |
| Italy(Turin)  | 4.4       | 3.4       | 7.6       | 7.6       | -         | -    |
| Estonia*      | -         | -         | 30.4      | 25.8      | 30.8      | -    |
| Lithuania*    | -         | -         | 39.5      | 35.5      | 36.8      | -    |
| Japan*        | 8.3       | 9.2       | 11.9      | 17.1      | 22.7      | 22.3 |
| South Korea*  | 12.6      | 11.3      | 16.6      | 17.6      | 16.0      | 14.9 |

\*Correction method was applied to these countries.

### Reference

1. Kunst AE, Groenhouf F, Mackenbach JP. Mortality by occupational class among men 30-64 years in 11 European countries. EU Working Group on Socioeconomic Inequalities in Health. *Soc Sci Med.* 1998;46(11):1459-1476.
2. Kunst AE, Groenhouf F, Mackenbach JP, Health EW. Occupational class and cause specific mortality in middle aged men in 11 European countries: comparison of population based studies. EU Working Group on Socioeconomic Inequalities in Health. *BMJ.* 1998;316(7145):1636-1642.
3. Toch-Marquardt M, Menvielle G, Eikemo TA, et al. Occupational class inequalities in all-cause and cause-specific mortality among middle-aged men in 14 European populations during the early 2000s. *PLoS One.* 2014;9(9):e108072.
4. Eurostat. Previous occupations of the unemployed, by sex (1000). 2017; [http://ec.europa.eu/eurostat/web/products-datasets/product?code=lfsa\\_ugpis](http://ec.europa.eu/eurostat/web/products-datasets/product?code=lfsa_ugpis). [accessed 10 December 2017].
5. Portal site of official statistics of Japan. National census. 2017; [https://www.e-stat.go.jp/stat-search/database?page=1&toukei=00200521&result\\_page=1](https://www.e-stat.go.jp/stat-search/database?page=1&toukei=00200521&result_page=1). [accessed 10 December 2017]
6. KOREA Statistical Information Service. Working persons by city&province/gender/type of work/occupation (15 years and over). 2017; [http://kosis.kr/statHtml/statHtml.do?orgId=101&tblId=DT\\_1BA9504&conn\\_path=I3](http://kosis.kr/statHtml/statHtml.do?orgId=101&tblId=DT_1BA9504&conn_path=I3) [accessed 5 March 2018].

#### **Appendix 4 – Age-standardized mortality rate (ASMR) by occupational class**

This appendix describes the original data we analyzed. Appendix Table 4-1 to 4-10 show detailed age-standardized mortality rate by country. Appendix Table 4-11 shows age-standardized mortality rate difference calculated by original data shown in Figure 1. The mortality differences in 8 Western European countries were clear and showed social gradients; that is, upper non-manual workers had the lowest mortality and manual workers had the highest mortality. Meanwhile, the trends of mortality by occupational class were different in Japan and South Korea.

Figures shown in this appendix are follows;

- Appendix Figure 4-1. Male age-standardized mortality rate and population distribution by occupational class among 8 European countries, Japan, and South Korea by study period (after applying correction factor)
- Appendix Figure 4-2. Trends in male all-cause mortality rate by occupational class (after applying correction factor)
- Appendix Figure 4-3. Changes in broad cause-specific contribution to inequality (%) among five occupational class estimated by average inter-group difference (AID absolute version)
- Appendix Figure 4-4. Age-standardized mortality rate aged 35-64 men and contribution of cause-specific death by countries (before applying correction factor)

**Appendix Table 4-1. Age-standardized all-cause and cause-specific mortality by occupational class, men aged 35-64 in Finland (per 100,000 person-years)**

| Finland                           |                  | 1990-1994 | 1995-1999 | 2000-2004 | 2005-2009 | 2010-2014 | Change* |                                              |                             | 1990-1994 | 1995-1999 | 2000-2004 | 2005-2009 | 2010-2014 | Change* |
|-----------------------------------|------------------|-----------|-----------|-----------|-----------|-----------|---------|----------------------------------------------|-----------------------------|-----------|-----------|-----------|-----------|-----------|---------|
| <b>All-cause</b>                  |                  |           |           |           |           |           |         |                                              | <b>Cause-specific death</b> |           |           |           |           |           |         |
| All-cause                         | All population   | 791       | 699       | 631       | 592       | 502       | -290    | Ischemic heart disease (I20-I25)             | All population              | 215       | 161       | 125       | 100       | 79        | -136    |
|                                   | Upper non-manual | 456       | 380       | 342       | 308       | 248       | -208    |                                              | Upper non-manual            | 117       | 82        | 63        | 48        | 37        | -80     |
|                                   | Lower non-manual | 618       | 536       | 498       | 455       | 416       | -202    |                                              | Lower non-manual            | 173       | 124       | 101       | 79        | 62        | -111    |
|                                   | Manual           | 989       | 901       | 812       | 767       | 640       | -349    |                                              | Manual                      | 265       | 206       | 163       | 131       | 107       | -157    |
|                                   | Farmers          | 683       | 622       | 549       | 519       | 469       | -215    |                                              | Farmers                     | 204       | 163       | 114       | 102       | 81        | -124    |
|                                   | Self-employed    | 663       | 564       | 505       | 495       | 402       | -262    |                                              | Self-employed               | 174       | 137       | 101       | 80        | 55        | -119    |
| <b>Broad cause-specific death</b> |                  |           |           |           |           |           |         |                                              |                             |           |           |           |           |           |         |
| All cancer (C00-D48)              | All population   | 172       | 156       | 143       | 131       | 117       | -55     | Cerebrovascular disease (I60-I69)            | All population              | 47        | 38        | 32        | 25        | 20        | -27     |
|                                   | Upper non-manual | 130       | 108       | 97        | 90        | 77        | -53     |                                              | Upper non-manual            | 30        | 19        | 19        | 12        | 10        | -20     |
|                                   | Lower non-manual | 149       | 137       | 128       | 116       | 110       | -39     |                                              | Lower non-manual            | 37        | 31        | 28        | 19        | 15        | -21     |
|                                   | Manual           | 200       | 186       | 173       | 156       | 140       | -60     |                                              | Manual                      | 57        | 46        | 39        | 33        | 25        | -32     |
|                                   | Farmers          | 147       | 134       | 124       | 103       | 87        | -61     |                                              | Farmers                     | 40        | 44        | 29        | 28        | 24        | -16     |
|                                   | Self-employed    | 153       | 142       | 120       | 126       | 109       | -44     |                                              | Self-employed               | 41        | 35        | 28        | 23        | 17        | -24     |
| Cardiovascular disease (I00-I99)  | All population   | 316       | 245       | 204       | 176       | 146       | -170    | Smoking-related causes (C32-34, J40-44, J47) | All population              | 64        | 54        | 46        | 42        | 37        | -27     |
|                                   | Upper non-manual | 179       | 126       | 106       | 88        | 70        | -109    |                                              | Upper non-manual            | 28        | 17        | 19        | 17        | 13        | -15     |
|                                   | Lower non-manual | 250       | 188       | 164       | 134       | 113       | -137    |                                              | Lower non-manual            | 45        | 39        | 29        | 31        | 30        | -15     |
|                                   | Manual           | 388       | 312       | 263       | 230       | 193       | -195    |                                              | Manual                      | 87        | 78        | 67        | 60        | 55        | -32     |
|                                   | Farmers          | 297       | 252       | 190       | 178       | 144       | -153    |                                              | Farmers                     | 46        | 37        | 36        | 28        | 22        | -24     |
|                                   | Self-employed    | 263       | 205       | 170       | 144       | 110       | -153    |                                              | Self-employed               | 47        | 37        | 34        | 38        | 21        | -25     |
| External causes (V01-Y98)         | All population   | 176       | 155       | 143       | 138       | 103       | -73     | Suicide (X60-X84, Y87.0)                     | All population              | 63        | 52        | 43        | 39        | 31        | -32     |
|                                   | Upper non-manual | 80        | 74        | 71        | 63        | 44        | -36     |                                              | Upper non-manual            | 30        | 28        | 22        | 20        | 12        | -18     |
|                                   | Lower non-manual | 121       | 108       | 98        | 96        | 81        | -40     |                                              | Lower non-manual            | 47        | 39        | 32        | 31        | 26        | -20     |
|                                   | Manual           | 239       | 213       | 190       | 183       | 132       | -107    |                                              | Manual                      | 81        | 67        | 55        | 49        | 40        | -41     |
|                                   | Farmers          | 133       | 126       | 117       | 126       | 118       | -16     |                                              | Farmers                     | 55        | 49        | 43        | 48        | 44        | -11     |
|                                   | Self-employed    | 149       | 115       | 115       | 114       | 86        | -63     |                                              | Self-employed               | 62        | 39        | 34        | 29        | 28        | -34     |
| Other causes                      | All population   | 128       | 143       | 142       | 147       | 136       | 8       | Road traffic accidents (V01-V89, Y85)        | All population              | 14        | 13        | 12        | 9         | 8         | -7      |
|                                   | Upper non-manual | 67        | 71        | 69        | 68        | 57        | -10     |                                              | Upper non-manual            | 9         | 6         | 7         | 5         | 4         | -5      |
|                                   | Lower non-manual | 99        | 103       | 107       | 110       | 113       | 15      |                                              | Lower non-manual            | 10        | 10        | 7         | 6         | 5         | -5      |
|                                   | Manual           | 162       | 190       | 187       | 197       | 176       | 14      |                                              | Manual                      | 18        | 16        | 14        | 11        | 9         | -9      |
|                                   | Farmers          | 106       | 110       | 118       | 112       | 121       | 15      |                                              | Farmers                     | 12        | 13        | 16        | 14        | 14        | 3       |
|                                   | Self-employed    | 98        | 102       | 99        | 112       | 97        | -1      |                                              | Self-employed               | 16        | 15        | 15        | 10        | 9         | -7      |

\*Absolute mortality changes between 1990-1994 and 2010-2014.

**Appendix Table 4-2. Age-standardized all-cause and cause-specific mortality by occupational class, men aged 35-64 in Denmark (per 100,000 person-years)**

| Denmark                           |                  | 1995-1999 | 2000-2004 | 2005-2009 | 2010-2014 | Change* |                                              |                  |     |     |     | 1995-1999 | 2000-2004 | 2005-2009 | 2010-2014 | Change* |
|-----------------------------------|------------------|-----------|-----------|-----------|-----------|---------|----------------------------------------------|------------------|-----|-----|-----|-----------|-----------|-----------|-----------|---------|
| <b>All-cause</b>                  |                  |           |           |           |           |         | <b>Cause-specific death</b>                  |                  |     |     |     |           |           |           |           |         |
| All-cause                         | All population   | 679       | 591       | 533       | 462       | -217    | Ischemic heart disease (I20-I25)             | All population   | 100 | 66  | 46  | 36        | -64       |           |           |         |
|                                   | Upper non-manual | 444       | 380       | 329       | 276       | -168    |                                              | Upper non-manual | 66  | 39  | 30  | 20        | -46       |           |           |         |
|                                   | Lower non-manual | 700       | 686       | 588       | 513       | -187    |                                              | Lower non-manual | 84  | 84  | 47  | 38        | -46       |           |           |         |
|                                   | Manual           | 883       | 743       | 773       | 635       | -248    |                                              | Manual           | 122 | 76  | 64  | 50        | -73       |           |           |         |
|                                   | Farmers          | 747       | 868       | 1192      | 974       | 227     |                                              | Farmers          | 112 | 100 | 129 | 46        | -66       |           |           |         |
|                                   | Self-employed    | 379       | 324       | 263       | 202       | -177    |                                              | Self-employed    | 64  | 40  | 23  | 18        | -46       |           |           |         |
| <b>Broad cause-specific death</b> |                  |           |           |           |           |         |                                              |                  |     |     |     |           |           |           |           |         |
| All cancer (C00-D48)              | All population   | 218       | 198       | 178       | 159       | -59     | Cerebrovascular disease (I60-I69)            | All population   | 30  | 28  | 22  | 16        | -14       |           |           |         |
|                                   | Upper non-manual | 163       | 143       | 130       | 114       | -48     |                                              | Upper non-manual | 18  | 20  | 13  | 9         | -9        |           |           |         |
|                                   | Lower non-manual | 206       | 213       | 189       | 168       | -38     |                                              | Lower non-manual | 26  | 28  | 24  | 15        | -11       |           |           |         |
|                                   | Manual           | 265       | 229       | 225       | 195       | -71     |                                              | Manual           | 36  | 32  | 32  | 22        | -14       |           |           |         |
|                                   | Farmers          | 223       | 245       | 316       | 215       | -8      |                                              | Farmers          | 14  | 44  | 11  | 73        | 59        |           |           |         |
|                                   | Self-employed    | 146       | 140       | 116       | 91        | -55     |                                              | Self-employed    | 17  | 15  | 10  | 6         | -11       |           |           |         |
| Cardiovascular disease (I00-I99)  | All population   | 174       | 139       | 106       | 82        | -92     | Smoking-related causes (C32-34, J40-44, J47) | All population   | 82  | 69  | 62  | 55        | -27       |           |           |         |
|                                   | Upper non-manual | 116       | 91        | 70        | 49        | -66     |                                              | Upper non-manual | 44  | 37  | 31  | 27        | -18       |           |           |         |
|                                   | Lower non-manual | 162       | 168       | 106       | 85        | -77     |                                              | Lower non-manual | 78  | 71  | 67  | 57        | -20       |           |           |         |
|                                   | Manual           | 208       | 160       | 148       | 109       | -99     |                                              | Manual           | 114 | 87  | 99  | 83        | -31       |           |           |         |
|                                   | Farmers          | 166       | 162       | 220       | 164       | -2      |                                              | Farmers          | 86  | 103 | 128 | 43        | -42       |           |           |         |
|                                   | Self-employed    | 105       | 81        | 52        | 38        | -67     |                                              | Self-employed    | 37  | 36  | 28  | 19        | -18       |           |           |         |
| External causes (V01-Y98)         | All population   | 69        | 60        | 56        | 51        | -19     | Suicide (X60-X84, Y87.0)                     | All population   | 29  | 25  | 21  | 23        | -6        |           |           |         |
|                                   | Upper non-manual | 40        | 34        | 29        | 31        | -8      |                                              | Upper non-manual | 19  | 16  | 12  | 16        | -3        |           |           |         |
|                                   | Lower non-manual | 74        | 73        | 57        | 53        | -21     |                                              | Lower non-manual | 32  | 31  | 23  | 25        | -7        |           |           |         |
|                                   | Manual           | 105       | 89        | 96        | 78        | -26     |                                              | Manual           | 38  | 34  | 32  | 33        | -5        |           |           |         |
|                                   | Farmers          | 198       | 57        | 77        | 123       | -75     |                                              | Farmers          | 63  | 18  | 21  | 50        | -13       |           |           |         |
|                                   | Self-employed    | 44        | 38        | 34        | 25        | -18     |                                              | Self-employed    | 22  | 19  | 17  | 13        | -8        |           |           |         |
| Other causes                      | All population   | 218       | 194       | 193       | 170       | -48     | Road traffic accidents (V01-V89, Y85)        | All population   | 11  | 10  | 8   | 6         | -5        |           |           |         |
|                                   | Upper non-manual | 126       | 111       | 100       | 81        | -45     |                                              | Upper non-manual | 6   | 6   | 5   | 3         | -3        |           |           |         |
|                                   | Lower non-manual | 258       | 231       | 236       | 207       | -51     |                                              | Lower non-manual | 10  | 10  | 7   | 6         | -4        |           |           |         |
|                                   | Manual           | 305       | 265       | 305       | 253       | -52     |                                              | Manual           | 16  | 14  | 13  | 8         | -7        |           |           |         |
|                                   | Farmers          | 160       | 404       | 578       | 472       | 312     |                                              | Farmers          | 35  | 12  | 19  | 6         | -28       |           |           |         |
|                                   | Self-employed    | 84        | 66        | 62        | 48        | -37     |                                              | Self-employed    | 10  | 7   | 6   | 3         | -6        |           |           |         |

\*Absolute mortality changes between 1995-1999 and 2010-2014.



**Appendix Table 4-3. Age-standardized all-cause and cause-specific mortality by occupational class, men aged 35-64 in England/Wales (per 100,000 person-years)**

| England/Wales                     |                  | 1990-1994 | 1995-1999 | 2000-2004 | 2005-2009 | 2010-2014 | Change* |                                              |                  | 1990-1994 | 1995-1999 | 2000-2004 | 2005-2009 | 2010-2014 | Change* |
|-----------------------------------|------------------|-----------|-----------|-----------|-----------|-----------|---------|----------------------------------------------|------------------|-----------|-----------|-----------|-----------|-----------|---------|
| <b>All-cause</b>                  |                  |           |           |           |           |           |         | <b>Cause-specific death</b>                  |                  |           |           |           |           |           |         |
| All-cause                         | All population   | 606       | 532       | 471       | 398       | 337       | -134    | Ischemic heart disease (I20-I25)             | All population   | 192       | 150       | 103       | 79        | 58        | -45     |
|                                   | Upper non-manual | 465       | 329       | 342       | 276       | 240       | -101    |                                              | Upper non-manual | 144       | 90        | 70        | 55        | 45        | -25     |
|                                   | Lower non-manual | 480       | 421       | 376       | 391       | 290       | -85     |                                              | Lower non-manual | 138       | 118       | 81        | 96        | 52        | -30     |
|                                   | Manual           | 671       | 600       | 585       | 504       | 407       | -177    |                                              | Manual           | 226       | 171       | 136       | 104       | 63        | -73     |
|                                   | Farmers          | -         | -         | -         | -         | -         | -       |                                              | Farmers          | -         | -         | -         | -         | -         | -       |
|                                   | Self-employed    | -         | -         | 424       | 361       | 289       | -135    |                                              | Self-employed    | -         | -         | 85        | 67        | 46        | -39     |
| <b>Broad cause-specific death</b> |                  |           |           |           |           |           |         |                                              |                  |           |           |           |           |           |         |
| All cancer (C00-D48)              | All population   | 214       | 190       | 171       | 147       | 129       | -42     | Cerebrovascular disease (I60-I69)            | All population   | 31        | 24        | 20        | 15        | 11        | -9      |
|                                   | Upper non-manual | 180       | 137       | 153       | 123       | 107       | -46     |                                              | Upper non-manual | 18        | 22        | 13        | 8         | 6         | -7      |
|                                   | Lower non-manual | 182       | 170       | 123       | 159       | 102       | -20     |                                              | Lower non-manual | 26        | 16        | 4         | 16        | 15        | 11      |
|                                   | Manual           | 233       | 205       | 197       | 167       | 147       | -50     |                                              | Manual           | 34        | 30        | 22        | 17        | 14        | -8      |
|                                   | Farmers          | -         | -         | -         | -         | -         | -       |                                              | Farmers          | -         | -         | -         | -         | -         | -       |
|                                   | Self-employed    | -         | -         | 157       | 148       | 128       | -29     |                                              | Self-employed    | -         | -         | 23        | 20        | 5         | -17     |
| Cardiovascular disease (I00-I99)  | All population   | 257       | 203       | 151       | 118       | 89        | -62     | Smoking-related causes (C32-34, J40-44, J47) | All population   | 88        | 65        | 63        | 42        | 42        | -21     |
|                                   | Upper non-manual | 199       | 136       | 102       | 79        | 60        | -42     |                                              | Upper non-manual | 41        | 18        | 40        | 26        | 26        | -14     |
|                                   | Lower non-manual | 197       | 157       | 114       | 119       | 92        | -22     |                                              | Lower non-manual | 59        | 40        | 38        | 46        | 25        | -12     |
|                                   | Manual           | 292       | 231       | 191       | 154       | 106       | -85     |                                              | Manual           | 106       | 84        | 82        | 59        | 55        | -27     |
|                                   | Farmers          | -         | -         | -         | -         | -         | -       |                                              | Farmers          | -         | -         | -         | -         | -         | -       |
|                                   | Self-employed    | -         | -         | 138       | 112       | 62        | -76     |                                              | Self-employed    | -         | -         | 63        | 39        | 39        | -24     |
| External causes (V01-Y98)         | All population   | 31        | 37        | 32        | 30        | 27        | -5      | Suicide (X60-X84, Y87.0)                     | All population   | 12        | 11        | 10        | 12        | 10        | 0       |
|                                   | Upper non-manual | 20        | 12        | 22        | 21        | 19        | -3      |                                              | Upper non-manual | 6         | 6         | 7         | 8         | 11        | 4       |
|                                   | Lower non-manual | 24        | 29        | 14        | 34        | 15        | 1       |                                              | Lower non-manual | 8         | 9         | 0         | 16        | 5         | 5       |
|                                   | Manual           | 36        | 43        | 40        | 43        | 32        | -9      |                                              | Manual           | 16        | 13        | 11        | 17        | 10        | -1      |
|                                   | Farmers          | -         | -         | -         | -         | -         | -       |                                              | Farmers          | -         | -         | -         | -         | -         | -       |
|                                   | Self-employed    | -         | -         | 45        | 24        | 40        | -5      |                                              | Self-employed    | -         | -         | 16        | 20        | 11        | -5      |
| Other causes                      | All population   | 105       | 102       | 118       | 103       | 92        | -26     | Road traffic accidents (V01-V89, Y85)        | All population   | 5         | 7         | 7         | 4         | 2         | -5      |
|                                   | Upper non-manual | 65        | 44        | 64        | 53        | 54        | -11     |                                              | Upper non-manual | 5         | 0         | 5         | 2         | 2         | -3      |
|                                   | Lower non-manual | 77        | 65        | 124       | 79        | 81        | -43     |                                              | Lower non-manual | 6         | 8         | 6         | 12        | 0         | -6      |
|                                   | Manual           | 110       | 121       | 157       | 140       | 123       | -34     |                                              | Manual           | 4         | 8         | 8         | 6         | 2         | -6      |
|                                   | Farmers          | -         | -         | -         | -         | -         | -       |                                              | Farmers          | -         | -         | -         | -         | -         | -       |
|                                   | Self-employed    | -         | -         | 83        | 77        | 58        | -25     |                                              | Self-employed    | -         | -         | 10        | 1         | 2         | -8      |

\*Absolute mortality changes between 2000-2004 and 2010-2014.

**Appendix Table 4-4. Age-standardized all-cause and cause-specific mortality by occupational class, men aged 35-64 in France (per 100,000 person-years)**

| France                            |                  | 1990-1994 | 1995-1999 | 2000-2004 | 2005-2009 | Change* |                                              |                  | 1990-1994 | 1995-1999 | 2000-2004 | 2005-2009 | Change* |
|-----------------------------------|------------------|-----------|-----------|-----------|-----------|---------|----------------------------------------------|------------------|-----------|-----------|-----------|-----------|---------|
| <b>All-cause</b>                  |                  |           |           |           |           |         | <b>Cause-specific death</b>                  |                  |           |           |           |           |         |
| All-cause                         | All population   | 700       | 689       | 610       | 552       | -149    | Ischemic heart disease (I20-I25)             | All population   | 59        | 51        | 44        | 40        | -19     |
|                                   | Upper non-manual | 457       | 438       | 379       | 386       | -71     |                                              | Upper non-manual | 50        | 31        | 32        | 24        | -26     |
|                                   | Lower non-manual | 943       | 838       | 822       | 694       | -248    |                                              | Lower non-manual | 65        | 59        | 38        | 43        | -23     |
|                                   | Manual           | 980       | 983       | 912       | 772       | -208    |                                              | Manual           | 69        | 76        | 65        | 54        | -15     |
|                                   | Farmers          | 500       | 575       | 422       | 410       | -91     |                                              | Farmers          | 45        | 38        | 31        | 55        | 10      |
|                                   | Self-employed    | 436       | 484       | 411       | 441       | 5       |                                              | Self-employed    | 51        | 30        | 33        | 45        | -6      |
| <b>Broad cause-specific death</b> |                  |           |           |           |           |         |                                              |                  |           |           |           |           |         |
| All cancer (C00-D48)              | All population   | 300       | 305       | 265       | 242       | -58     | Cerebrovascular disease (I60-I69)            | All population   | 25        | 25        | 18        | 17        | -8      |
|                                   | Upper non-manual | 217       | 206       | 184       | 192       | -25     |                                              | Upper non-manual | 10        | 7         | 13        | 8         | -2      |
|                                   | Lower non-manual | 390       | 367       | 330       | 272       | -118    |                                              | Lower non-manual | 25        | 22        | 17        | 19        | -7      |
|                                   | Manual           | 416       | 435       | 375       | 333       | -83     |                                              | Manual           | 37        | 39        | 26        | 28        | -9      |
|                                   | Farmers          | 191       | 244       | 188       | 151       | -39     |                                              | Farmers          | 27        | 39        | 16        | 14        | -12     |
|                                   | Self-employed    | 173       | 183       | 169       | 187       | 14      |                                              | Self-employed    | 22        | 18        | 5         | 14        | -8      |
| Cardiovascular disease (I00-I99)  | All population   | 134       | 123       | 99        | 95        | -38     | Smoking-related causes (C32-34, J40-44, J47) | All population   | 43        | 31        | 35        | 42        | -2      |
|                                   | Upper non-manual | 86        | 69        | 62        | 63        | -23     |                                              | Upper non-manual | 68        | 20        | 23        | 26        | -42     |
|                                   | Lower non-manual | 169       | 170       | 114       | 109       | -59     |                                              | Lower non-manual | 129       | 29        | 60        | 43        | -86     |
|                                   | Manual           | 172       | 175       | 148       | 132       | -40     |                                              | Manual           | 150       | 44        | 40        | 60        | -91     |
|                                   | Farmers          | 106       | 109       | 72        | 97        | -10     |                                              | Farmers          | 51        | 32        | 32        | 44        | -7      |
|                                   | Self-employed    | 112       | 86        | 73        | 93        | -19     |                                              | Self-employed    | 48        | 26        | 39        | 32        | -16     |
| External causes (V01-Y98)         | All population   | 98        | 89        | 76        | 76        | -22     | Suicide (X60-X84, Y87.0)                     | All population   | 101       | 107       | 84        | 86        | -16     |
|                                   | Upper non-manual | 64        | 57        | 48        | 49        | -15     |                                              | Upper non-manual | 31        | 65        | 50        | 60        | 29      |
|                                   | Lower non-manual | 122       | 94        | 115       | 91        | -31     |                                              | Lower non-manual | 62        | 148       | 70        | 92        | 29      |
|                                   | Manual           | 134       | 118       | 99        | 106       | -28     |                                              | Manual           | 58        | 160       | 142       | 135       | 77      |
|                                   | Farmers          | 84        | 93        | 66        | 71        | -13     |                                              | Farmers          | 24        | 79        | 57        | 44        | 20      |
|                                   | Self-employed    | 83        | 95        | 73        | 67        | -16     |                                              | Self-employed    | 41        | 49        | 53        | 49        | 7       |
| Other causes                      | All population   | 169       | 172       | 170       | 138       | -30     | Road traffic accidents (V01-V89, Y85)        | All population   | 20        | 21        | 10        | 9         | -10     |
|                                   | Upper non-manual | 90        | 106       | 85        | 83        | -7      |                                              | Upper non-manual | 15        | 19        | 4         | 4         | -12     |
|                                   | Lower non-manual | 261       | 208       | 263       | 222       | -40     |                                              | Lower non-manual | 14        | 13        | 12        | 8         | -6      |
|                                   | Manual           | 258       | 255       | 291       | 201       | -57     |                                              | Manual           | 28        | 22        | 17        | 14        | -14     |
|                                   | Farmers          | 119       | 129       | 96        | 91        | -28     |                                              | Farmers          | 25        | 35        | 11        | 16        | -9      |
|                                   | Self-employed    | 67        | 121       | 97        | 95        | 27      |                                              | Self-employed    | 0         | 21        | 5         | 15        | 15      |

\*Absolute mortality changes between 1990-1994 and 2005-2009.

**Appendix Table 4-5. Age-standardized all-cause and cause-specific mortality by occupational class, men aged 35-64 in Switzerland (per 100,000 person-years)**

| Switzerland                       |                  | 1990-1994 | 1995-1999 | 2000-2004 | 2005-2009 | 2010-2014 | Change* |                                              |                             |     |     |    |    |    |     | 1990-1994 | 1995-1999 | 2000-2004 | 2005-2009 | 2010-2014 | Change* |
|-----------------------------------|------------------|-----------|-----------|-----------|-----------|-----------|---------|----------------------------------------------|-----------------------------|-----|-----|----|----|----|-----|-----------|-----------|-----------|-----------|-----------|---------|
| <b>All-cause</b>                  |                  |           |           |           |           |           |         |                                              | <b>Cause-specific death</b> |     |     |    |    |    |     |           |           |           |           |           |         |
| All-cause                         | All population   | 571       | 504       | 438       | 378       | 327       | -244    | Ischemic heart disease (I20-I25)             | All population              | 93  | 74  | 54 | 46 | 35 | -58 |           |           |           |           |           |         |
|                                   | Upper non-manual | 421       | 383       | 304       | 279       | 240       | -181    |                                              | Upper non-manual            | 73  | 60  | 41 | 34 | 25 | -48 |           |           |           |           |           |         |
|                                   | Lower non-manual | 693       | 625       | 566       | 467       | 422       | -270    |                                              | Lower non-manual            | 110 | 94  | 64 | 50 | 40 | -70 |           |           |           |           |           |         |
|                                   | Manual           | 894       | 791       | 711       | 616       | 524       | -369    |                                              | Manual                      | 128 | 101 | 78 | 69 | 54 | -74 |           |           |           |           |           |         |
|                                   | Farmers          | 445       | 441       | 382       | 357       | 335       | -110    |                                              | Farmers                     | 57  | 59  | 43 | 42 | 46 | -11 |           |           |           |           |           |         |
|                                   | Self-employed    | 529       | 488       | 359       | 332       | 293       | -236    |                                              | Self-employed               | 88  | 72  | 46 | 47 | 34 | -54 |           |           |           |           |           |         |
| <b>Broad cause-specific death</b> |                  |           |           |           |           |           |         |                                              |                             |     |     |    |    |    |     |           |           |           |           |           |         |
| All cancer (C00-D48)              | All population   | 205       | 183       | 162       | 145       | 123       | -81     | Cerebrovascular disease (I60-I69)            | All population              | 15  | 14  | 11 | 8  | 7  | -8  |           |           |           |           |           |         |
|                                   | Upper non-manual | 158       | 146       | 118       | 116       | 99        | -58     |                                              | Upper non-manual            | 10  | 9   | 6  | 6  | 4  | -6  |           |           |           |           |           |         |
|                                   | Lower non-manual | 236       | 219       | 202       | 166       | 139       | -97     |                                              | Lower non-manual            | 18  | 17  | 13 | 9  | 11 | -7  |           |           |           |           |           |         |
|                                   | Manual           | 296       | 274       | 248       | 217       | 187       | -109    |                                              | Manual                      | 24  | 24  | 18 | 15 | 10 | -13 |           |           |           |           |           |         |
|                                   | Farmers          | 166       | 157       | 134       | 133       | 110       | -56     |                                              | Farmers                     | 10  | 10  | 9  | 8  | 6  | -4  |           |           |           |           |           |         |
|                                   | Self-employed    | 195       | 175       | 137       | 130       | 119       | -76     |                                              | Self-employed               | 10  | 13  | 10 | 7  | 6  | -5  |           |           |           |           |           |         |
| Cardiovascular disease (I00-I99)  | All population   | 164       | 130       | 101       | 84        | 70        | -93     | Smoking-related causes (C32-34, J40-44, J47) | All population              | 77  | 65  | 54 | 46 | 38 | -39 |           |           |           |           |           |         |
|                                   | Upper non-manual | 121       | 101       | 74        | 62        | 50        | -72     |                                              | Upper non-manual            | 48  | 43  | 32 | 29 | 25 | -23 |           |           |           |           |           |         |
|                                   | Lower non-manual | 197       | 162       | 117       | 97        | 85        | -111    |                                              | Lower non-manual            | 93  | 83  | 72 | 60 | 47 | -46 |           |           |           |           |           |         |
|                                   | Manual           | 247       | 192       | 154       | 135       | 112       | -135    |                                              | Manual                      | 134 | 118 | 98 | 83 | 74 | -61 |           |           |           |           |           |         |
|                                   | Farmers          | 116       | 121       | 78        | 81        | 89        | -28     |                                              | Farmers                     | 59  | 63  | 42 | 50 | 30 | -29 |           |           |           |           |           |         |
|                                   | Self-employed    | 146       | 127       | 89        | 79        | 65        | -82     |                                              | Self-employed               | 68  | 57  | 39 | 40 | 35 | -34 |           |           |           |           |           |         |
| External causes (V01-Y98)         | All population   | 85        | 71        | 63        | 59        | 47        | -38     | Suicide (X60-X84, Y87.0)                     | All population              | 43  | 40  | 35 | 30 | 25 | -18 |           |           |           |           |           |         |
|                                   | Upper non-manual | 62        | 54        | 43        | 43        | 35        | -27     |                                              | Upper non-manual            | 32  | 32  | 24 | 22 | 19 | -14 |           |           |           |           |           |         |
|                                   | Lower non-manual | 97        | 81        | 76        | 73        | 51        | -46     |                                              | Lower non-manual            | 50  | 46  | 43 | 44 | 29 | -21 |           |           |           |           |           |         |
|                                   | Manual           | 140       | 98        | 98        | 95        | 70        | -70     |                                              | Manual                      | 67  | 52  | 52 | 47 | 37 | -31 |           |           |           |           |           |         |
|                                   | Farmers          | 93        | 90        | 91        | 75        | 70        | -23     |                                              | Farmers                     | 47  | 40  | 38 | 33 | 37 | -9  |           |           |           |           |           |         |
|                                   | Self-employed    | 88        | 76        | 65        | 52        | 41        | -47     |                                              | Self-employed               | 52  | 49  | 45 | 29 | 24 | -28 |           |           |           |           |           |         |
| Other causes                      | All population   | 118       | 120       | 111       | 91        | 87        | -31     | Road traffic accidents (V01-V89, Y85)        | All population              | 13  | 10  | 9  | 7  | 5  | -8  |           |           |           |           |           |         |
|                                   | Upper non-manual | 79        | 81        | 68        | 59        | 56        | -24     |                                              | Upper non-manual            | 9   | 7   | 6  | 5  | 4  | -5  |           |           |           |           |           |         |
|                                   | Lower non-manual | 163       | 163       | 171       | 131       | 147       | -16     |                                              | Lower non-manual            | 16  | 14  | 9  | 6  | 3  | -13 |           |           |           |           |           |         |
|                                   | Manual           | 211       | 226       | 211       | 167       | 155       | -55     |                                              | Manual                      | 20  | 12  | 14 | 10 | 7  | -13 |           |           |           |           |           |         |
|                                   | Farmers          | 69        | 73        | 78        | 68        | 66        | -3      |                                              | Farmers                     | 18  | 12  | 19 | 14 | 10 | -8  |           |           |           |           |           |         |
|                                   | Self-employed    | 100       | 110       | 68        | 72        | 68        | -32     |                                              | Self-employed               | 15  | 13  | 10 | 10 | 6  | -9  |           |           |           |           |           |         |

\*Absolute mortality changes between 1990-1994 and 2010-2014.

**Appendix Table 4-6. Age-standardized all-cause and cause-specific mortality by occupational class, men aged 35-64 in Italy (Turin) (per 100,000 person-years)**

| Italy(Turin)                      |                  | 1990-1994 | 1995-1999 | 2000-2004 | 2005-2009 | Change* |                                              |                  | 1990-1994 | 1995-1999 | 2000-2004 | 2005-2009 | Change* |
|-----------------------------------|------------------|-----------|-----------|-----------|-----------|---------|----------------------------------------------|------------------|-----------|-----------|-----------|-----------|---------|
| <b>All-cause</b>                  |                  |           |           |           |           |         | <b>Cause-specific death</b>                  |                  |           |           |           |           |         |
| All-cause                         | All population   | 542       | 450       | 390       | 363       | -178    | Ischemic heart disease (I20-I25)             | All population   | 75        | 59        | 46        | 41        | -33     |
|                                   | Upper non-manual | 341       | 290       | 235       | 236       | -104    |                                              | Upper non-manual | 53        | 39        | 27        | 32        | -20     |
|                                   | Lower non-manual | 479       | 374       | 317       | 275       | -204    |                                              | Lower non-manual | 73        | 50        | 49        | 35        | -38     |
|                                   | Manual           | 566       | 494       | 442       | 392       | -174    |                                              | Manual           | 72        | 65        | 51        | 40        | -31     |
|                                   | Farmers          | -         | -         | 521       | 657       | -       |                                              | Farmers          | -         | -         | 94        | 146       | -       |
|                                   | Self-employed    | 507       | 461       | 349       | 378       | -129    |                                              | Self-employed    | 77        | 61        | 42        | 38        | -39     |
| <b>Broad cause-specific death</b> |                  |           |           |           |           |         |                                              |                  |           |           |           |           |         |
| All cancer (C00-D48)              | All population   | 233       | 201       | 183       | 168       | -65     | Cerebrovascular disease (I60-I69)            | All population   | 30        | 18        | 15        | 13        | -18     |
|                                   | Upper non-manual | 147       | 148       | 118       | 126       | -21     |                                              | Upper non-manual | 22        | 12        | 9         | 11        | -12     |
|                                   | Lower non-manual | 200       | 179       | 155       | 130       | -70     |                                              | Lower non-manual | 31        | 7         | 11        | 12        | -19     |
|                                   | Manual           | 257       | 220       | 223       | 191       | -66     |                                              | Manual           | 31        | 20        | 16        | 13        | -19     |
|                                   | Farmers          | -         | -         | 181       | 292       | -       |                                              | Farmers          | -         | -         | 45        | 0         | -       |
|                                   | Self-employed    | 222       | 205       | 154       | 186       | -36     |                                              | Self-employed    | 24        | 19        | 12        | 12        | -12     |
| Cardiovascular disease (I00-I99)  | All population   | 156       | 120       | 95        | 81        | -75     | Smoking-related causes (C32-34, J40-44, J47) | All population   | 94        | 81        | 67        | 57        | -37     |
|                                   | Upper non-manual | 105       | 73        | 62        | 58        | -48     |                                              | Upper non-manual | 54        | 56        | 37        | 9         | -45     |
|                                   | Lower non-manual | 159       | 92        | 85        | 64        | -96     |                                              | Lower non-manual | 76        | 60        | 53        | 11        | -65     |
|                                   | Manual           | 152       | 133       | 103       | 82        | -70     |                                              | Manual           | 103       | 92        | 81        | 12        | -91     |
|                                   | Farmers          | -         | -         | 245       | 365       | -       |                                              | Farmers          | -         | -         | 136       | 0         | -       |
|                                   | Self-employed    | 142       | 125       | 90        | 79        | -63     |                                              | Self-employed    | 96        | 80        | 63        | 10        | -87     |
| External causes (V01-Y98)         | All population   | 42        | 32        | 34        | 31        | -12     | Suicide (X60-X84, Y87.0)                     | All population   | 15        | 11        | 14        | 12        | -3      |
|                                   | Upper non-manual | 32        | 17        | 26        | 17        | -15     |                                              | Upper non-manual | 13        | 9         | 11        | 30        | 17      |
|                                   | Lower non-manual | 36        | 30        | 23        | 22        | -14     |                                              | Lower non-manual | 15        | 12        | 12        | 39        | 24      |
|                                   | Manual           | 42        | 33        | 30        | 34        | -8      |                                              | Manual           | 14        | 10        | 15        | 73        | 59      |
|                                   | Farmers          | -         | -         | 54        | 0         | -       |                                              | Farmers          | -         | -         | 54        | 73        | -       |
|                                   | Self-employed    | 41        | 40        | 44        | 32        | -9      |                                              | Self-employed    | 15        | 13        | 12        | 64        | 49      |
| Other causes                      | All population   | 111       | 98        | 79        | 83        | -27     | Road traffic accidents (V01-V89, Y85)        | All population   | 14        | 9         | 9         | 7         | -6      |
|                                   | Upper non-manual | 57        | 52        | 30        | 36        | -21     |                                              | Upper non-manual | 12        | 5         | 8         | 2         | -10     |
|                                   | Lower non-manual | 85        | 74        | 55        | 60        | -25     |                                              | Lower non-manual | 14        | 9         | 5         | 4         | -10     |
|                                   | Manual           | 114       | 108       | 87        | 84        | -30     |                                              | Manual           | 13        | 8         | 7         | 11        | -2      |
|                                   | Farmers          | -         | -         | 42        | 0         | -       |                                              | Farmers          | -         | -         | 0         | 0         | -       |
|                                   | Self-employed    | 102       | 91        | 62        | 81        | -21     |                                              | Self-employed    | 11        | 17        | 17        | 11        | 0       |

\*Absolute mortality changes between 1990-1994 and 2005-2010.

**Appendix Table 4-7. Age-standardized all-cause and cause-specific mortality by occupational class, men aged 35-64 in Estonia (per 100,000 person-years)**

| Estonia                             |                  | 2000-2004 | 2005-2009 | 2010-2014 | Change* |                                                 |                  | 2000-2004 | 2005-2009 | 2010-2014 | Change* |
|-------------------------------------|------------------|-----------|-----------|-----------|---------|-------------------------------------------------|------------------|-----------|-----------|-----------|---------|
| <b>All-cause</b>                    |                  |           |           |           |         | <b>Cause-specific death</b>                     |                  |           |           |           |         |
| All-cause                           | All population   | 1385      | 1107      | 870       | -515    | Ischemic heart disease<br>(I20-I25)             | All population   | 279       | 186       | 127       | -153    |
|                                     | Upper non-manual | 763       | 612       | 470       | -294    |                                                 | Upper non-manual | 169       | 110       | 68        | -102    |
|                                     | Lower non-manual | 1280      | 1266      | 846       | -434    |                                                 | Lower non-manual | 230       | 213       | 125       | -106    |
|                                     | Manual           | 1639      | 1397      | 1064      | -575    |                                                 | Manual           | 304       | 225       | 158       | -146    |
|                                     | Farmers          | 1295      | 1152      | 806       | -489    |                                                 | Farmers          | 240       | 191       | 83        | -157    |
|                                     | Self-employed    | -         | -         | -         | -       |                                                 | Self-employed    | -         | -         | -         | -       |
| <b>Broad cause-specific death</b>   |                  |           |           |           |         |                                                 |                  |           |           |           |         |
| All cancer<br>(C00-D48)             | All population   | 282       | 248       | 221       | -61     | Cerebrovascular disease<br>(I60-I69)            | All population   | 102       | 54        | 32        | -71     |
|                                     | Upper non-manual | 178       | 144       | 140       | -39     |                                                 | Upper non-manual | 58        | 26        | 21        | -37     |
|                                     | Lower non-manual | 281       | 273       | 228       | -53     |                                                 | Lower non-manual | 102       | 75        | 10        | -91     |
|                                     | Manual           | 314       | 314       | 255       | -60     |                                                 | Manual           | 112       | 69        | 32        | -80     |
|                                     | Farmers          | 283       | 253       | 190       | -93     |                                                 | Farmers          | 80        | 52        | 25        | -56     |
|                                     | Self-employed    | -         | -         | -         | -       |                                                 | Self-employed    | -         | -         | -         | -       |
| Cardiovascular disease<br>(I00-I99) | All population   | 516       | 401       | 295       | -222    | Smoking-related causes<br>(C32-34, J40-44, J47) | All population   | 62        | 41        | 33        | -30     |
|                                     | Upper non-manual | 296       | 229       | 151       | -145    |                                                 | Upper non-manual | 46        | 34        | 29        | -17     |
|                                     | Lower non-manual | 454       | 469       | 293       | -162    |                                                 | Lower non-manual | 88        | 88        | 77        | -11     |
|                                     | Manual           | 586       | 502       | 362       | -224    |                                                 | Manual           | 124       | 118       | 92        | -32     |
|                                     | Farmers          | 425       | 384       | 210       | -215    |                                                 | Farmers          | 119       | 103       | 55        | -63     |
|                                     | Self-employed    | -         | -         | -         | -       |                                                 | Self-employed    | -         | -         | -         | -       |
| External causes<br>(V01-Y98)        | All population   | 322       | 217       | 153       | -169    | Suicide<br>(X60-X84, Y87.0)                     | All population   | 107       | 87        | 72        | -35     |
|                                     | Upper non-manual | 165       | 109       | 68        | -96     |                                                 | Upper non-manual | 40        | 23        | 18        | -22     |
|                                     | Lower non-manual | 272       | 235       | 155       | -118    |                                                 | Lower non-manual | 54        | 31        | 28        | -26     |
|                                     | Manual           | 404       | 280       | 211       | -192    |                                                 | Manual           | 76        | 53        | 43        | -33     |
|                                     | Farmers          | 356       | 263       | 211       | -146    |                                                 | Farmers          | 65        | 52        | 45        | -20     |
|                                     | Self-employed    | -         | -         | -         | -       |                                                 | Self-employed    | -         | -         | -         | -       |
| Other causes                        | All population   | 264       | 241       | 201       | -63     | Road traffic accidents<br>(V01-V89, Y85)        | All population   | 29        | 18        | 10        | -19     |
|                                     | Upper non-manual | 124       | 129       | 111       | -14     |                                                 | Upper non-manual | 18        | 14        | 7         | -12     |
|                                     | Lower non-manual | 272       | 290       | 171       | -101    |                                                 | Lower non-manual | 36        | 22        | 6         | -30     |
|                                     | Manual           | 335       | 300       | 237       | -98     |                                                 | Manual           | 35        | 20        | 13        | -21     |
|                                     | Farmers          | 232       | 252       | 196       | -35     |                                                 | Farmers          | 33        | 18        | 10        | -24     |
|                                     | Self-employed    | -         | -         | -         | -       |                                                 | Self-employed    | -         | -         | -         | -       |

\*Absolute mortality changes between 2000-2004 and 2010-2015.

**Appendix Table 4-8. Age-standardized all cause and cause-specific mortality by occupational class, men aged 35-64 in Lithuania (per 100,000 person-years)**

| Lithuania                           |                  | 2000-2004 | 2005-2009 | 2010-2014 | Change* |                                                 |                  | 2000-2004 | 2005-2009 | 2010-2014 | Change* |
|-------------------------------------|------------------|-----------|-----------|-----------|---------|-------------------------------------------------|------------------|-----------|-----------|-----------|---------|
| <b>All-cause</b>                    |                  |           |           |           |         | <b>Cause-specific death</b>                     |                  |           |           |           |         |
| All-cause                           | All population   | 1496      | 1602      | 1292      | -204    | Ischemic heart disease<br>(I20-I25)             | All population   | 310       | 317       | 264       | -46     |
|                                     | Upper non-manual | 745       | 806       | 714       | -32     |                                                 | Upper non-manual | 172       | 177       | 165       | -7      |
|                                     | Lower non-manual | 1127      | 1104      | 1066      | -61     |                                                 | Lower non-manual | 236       | 245       | 232       | -4      |
|                                     | Manual           | 1599      | 1845      | 1714      | 115     |                                                 | Manual           | 329       | 368       | 307       | -21     |
|                                     | Farmers          | 1705      | 1972      | 1050      | -655    |                                                 | Farmers          | 331       | 328       | 213       | -118    |
|                                     | Self-employed    | 1369      | 1494      | 620       | -748    |                                                 | Self-employed    | 264       | 282       | 132       | -133    |
| <b>Broad cause-specific death</b>   |                  |           |           |           |         |                                                 |                  |           |           |           |         |
| All cancer<br>(C00-D48)             | All population   | 305       | 305       | 272       | -33     | Cerebrovascular disease<br>(I60-I69)            | All population   | 81        | 85        | 74        | -7      |
|                                     | Upper non-manual | 182       | 176       | 166       | -16     |                                                 | Upper non-manual | 39        | 49        | 38        | -1      |
|                                     | Lower non-manual | 253       | 263       | 253       | 0       |                                                 | Lower non-manual | 81        | 80        | 64        | -17     |
|                                     | Manual           | 334       | 347       | 333       | 0       |                                                 | Manual           | 90        | 99        | 92        | 2       |
|                                     | Farmers          | 320       | 370       | 245       | -75     |                                                 | Farmers          | 77        | 82        | 38        | -39     |
|                                     | Self-employed    | 264       | 306       | 138       | -126    |                                                 | Self-employed    | 59        | 74        | 38        | -21     |
| Cardiovascular disease<br>(I00-I99) | All population   | 513       | 551       | 445       | -68     | Smoking-related causes<br>(C32-34, J40-44, J47) | All population   | 126       | 124       | 100       | -25     |
|                                     | Upper non-manual | 281       | 316       | 269       | -12     |                                                 | Upper non-manual | 43        | 37        | 38        | -4      |
|                                     | Lower non-manual | 404       | 412       | 385       | -19     |                                                 | Lower non-manual | 75        | 79        | 83        | 8       |
|                                     | Manual           | 548       | 638       | 540       | -8      |                                                 | Manual           | 138       | 145       | 142       | 4       |
|                                     | Farmers          | 519       | 571       | 324       | -195    |                                                 | Farmers          | 167       | 210       | 108       | -59     |
|                                     | Self-employed    | 434       | 490       | 217       | -217    |                                                 | Self-employed    | 113       | 126       | 31        | -82     |
| External causes<br>(V01-Y98)        | All population   | 293       | 256       | 197       | -96     | Suicide<br>(X60-X84, Y87.0)                     | All population   | 118       | 83        | 82        | -35     |
|                                     | Upper non-manual | 132       | 106       | 92        | -40     |                                                 | Upper non-manual | 47        | 29        | 34        | -13     |
|                                     | Lower non-manual | 202       | 146       | 150       | -52     |                                                 | Lower non-manual | 74        | 51        | 55        | -19     |
|                                     | Manual           | 327       | 305       | 290       | -36     |                                                 | Manual           | 128       | 95        | 123       | -5      |
|                                     | Farmers          | 413       | 417       | 233       | -180    |                                                 | Farmers          | 218       | 167       | 120       | -97     |
|                                     | Self-employed    | 299       | 239       | 114       | -185    |                                                 | Self-employed    | 130       | 89        | 57        | -74     |
| Other causes                        | All population   | 385       | 491       | 378       | -8      | Road traffic accidents<br>(V01-V89, Y85)        | All population   | 49        | 39        | 21        | -28     |
|                                     | Upper non-manual | 151       | 208       | 187       | 36      |                                                 | Upper non-manual | 26        | 18        | 12        | -14     |
|                                     | Lower non-manual | 269       | 283       | 278       | 9       |                                                 | Lower non-manual | 38        | 23        | 22        | -16     |
|                                     | Manual           | 390       | 555       | 550       | 160     |                                                 | Manual           | 53        | 43        | 30        | -23     |
|                                     | Farmers          | 453       | 613       | 247       | -205    |                                                 | Farmers          | 72        | 76        | 21        | -51     |
|                                     | Self-employed    | 372       | 459       | 152       | -221    |                                                 | Self-employed    | 56        | 41        | 11        | -45     |

\*Absolute mortality changes between 2000-2004 and 2010-2015.

**Appendix Table 4-9. Age-standardized all-cause and cause-specific mortality by occupational class, men aged 35-64 in Japan (per 100,000 person-years)**

| Japan                                                                                                |                  | 1990 | 1995 | 2000 | 2005 | 2010 | 2015 | Change* |                                            |                             |    |    |     |     |     |    | 1990 | 1995 | 2000 | 2005 | 2010 | 2015 | Change* |  |  |
|------------------------------------------------------------------------------------------------------|------------------|------|------|------|------|------|------|---------|--------------------------------------------|-----------------------------|----|----|-----|-----|-----|----|------|------|------|------|------|------|---------|--|--|
| <b>All-cause</b>                                                                                     |                  |      |      |      |      |      |      |         |                                            | <b>Cause-specific death</b> |    |    |     |     |     |    |      |      |      |      |      |      |         |  |  |
| All-cause                                                                                            | All population   | 537  | 505  | 478  | 436  | 401  | 340  | -165    | Ischemic heart disease<br>(I20-I25)        | All population              | NA | 37 | 35  | 35  | 33  | 28 | -9   |      |      |      |      |      |         |  |  |
|                                                                                                      | Upper non-manual | 414  | 408  | 642  | 616  | 498  | 357  | -51     |                                            | Upper non-manual            | NA | 34 | 53  | 51  | 47  | 35 | 1    |      |      |      |      |      |         |  |  |
|                                                                                                      | Lower non-manual | 568  | 502  | 412  | 347  | 292  | 258  | -244    |                                            | Lower non-manual            | NA | 44 | 36  | 35  | 31  | 24 | -20  |      |      |      |      |      |         |  |  |
|                                                                                                      | Manual           | 453  | 452  | 352  | 335  | 356  | 338  | -114    |                                            | Manual                      | NA | 35 | 31  | 32  | 34  | 32 | -4   |      |      |      |      |      |         |  |  |
|                                                                                                      | Farmers          | 1057 | 1082 | 1297 | 1193 | 1122 | 916  | -166    |                                            | Farmers                     | NA | 47 | 46  | 53  | 52  | 43 | -4   |      |      |      |      |      |         |  |  |
|                                                                                                      | Self-employed    | -    | -    | -    | -    | -    | -    | -       |                                            | Self-employed               | -  | -  | -   | -   | -   | -  | -    |      |      |      |      |      |         |  |  |
| <b>Broad cause-specific death</b>                                                                    |                  |      |      |      |      |      |      |         |                                            |                             |    |    |     |     |     |    |      |      |      |      |      |      |         |  |  |
| All cancer<br>(C00-C97)                                                                              | All population   | NA   | 204  | 184  | 161  | 143  | 123  | -82     | Cerebrovascular disease<br>(I60-I69)       | All population              | NA | 52 | 44  | 38  | 33  | 27 | -25  |      |      |      |      |      |         |  |  |
|                                                                                                      | Upper non-manual | NA   | 181  | 267  | 255  | 198  | 141  | -39     |                                            | Upper non-manual            | NA | 43 | 63  | 54  | 42  | 31 | -12  |      |      |      |      |      |         |  |  |
|                                                                                                      | Lower non-manual | NA   | 209  | 157  | 128  | 105  | 94   | -115    |                                            | Lower non-manual            | NA | 57 | 44  | 38  | 31  | 23 | -34  |      |      |      |      |      |         |  |  |
|                                                                                                      | Manual           | NA   | 154  | 112  | 100  | 111  | 112  | -42     |                                            | Manual                      | NA | 50 | 36  | 36  | 37  | 31 | -20  |      |      |      |      |      |         |  |  |
|                                                                                                      | Farmers          | NA   | 326  | 355  | 319  | 296  | 229  | -97     |                                            | Farmers                     | NA | 80 | 74  | 59  | 59  | 51 | -29  |      |      |      |      |      |         |  |  |
|                                                                                                      | Self-employed    | -    | -    | -    | -    | -    | -    | -       |                                            | Self-employed               | -  | -  | -   | -   | -   | -  | -    |      |      |      |      |      |         |  |  |
| Cardiovascular disease<br>(I01-I02.0, I10-I13, I05-<br>I09, I20-I25, I27, I30-<br>I51, I60-I69, I71) | All population   | NA   | 119  | 108  | 104  | 96   | 82   | -37     | Smoking-related causes<br>(C33-34, J41-44) | All population              | NA | 34 | 33  | 33  | 31  | 28 | -6   |      |      |      |      |      |         |  |  |
|                                                                                                      | Upper non-manual | NA   | 96   | 142  | 137  | 111  | 85   | -11     |                                            | Upper non-manual            | NA | 31 | 50  | 58  | 47  | 32 | 1    |      |      |      |      |      |         |  |  |
|                                                                                                      | Lower non-manual | NA   | 121  | 95   | 87   | 74   | 63   | -58     |                                            | Lower non-manual            | NA | 36 | 32  | 29  | 27  | 24 | -12  |      |      |      |      |      |         |  |  |
|                                                                                                      | Manual           | NA   | 105  | 81   | 84   | 89   | 85   | -20     |                                            | Manual                      | NA | 27 | 23  | 24  | 27  | 30 | 2    |      |      |      |      |      |         |  |  |
|                                                                                                      | Farmers          | NA   | 228  | 256  | 246  | 231  | 203  | -25     |                                            | Farmers                     | NA | 46 | 45  | 41  | 43  | 37 | -9   |      |      |      |      |      |         |  |  |
|                                                                                                      | Self-employed    | -    | -    | -    | -    | -    | -    | -       |                                            | Self-employed               | -  | -  | -   | -   | -   | -  | -    |      |      |      |      |      |         |  |  |
| External causes<br>(V01-X84)                                                                         | All population   | NA   | 69   | 84   | 77   | 68   | 49   | -21     | Suicide<br>(X60-X84)                       | All population              | NA | 33 | 53  | 51  | 44  | 32 | -1   |      |      |      |      |      |         |  |  |
|                                                                                                      | Upper non-manual | NA   | 51   | 111  | 99   | 78   | 50   | 0       |                                            | Upper non-manual            | NA | 29 | 83  | 75  | 61  | 40 | 11   |      |      |      |      |      |         |  |  |
|                                                                                                      | Lower non-manual | NA   | 61   | 72   | 60   | 49   | 36   | -25     |                                            | Lower non-manual            | NA | 40 | 62  | 51  | 42  | 29 | -11  |      |      |      |      |      |         |  |  |
|                                                                                                      | Manual           | NA   | 86   | 84   | 77   | 70   | 52   | -34     |                                            | Manual                      | NA | 43 | 59  | 54  | 50  | 34 | -9   |      |      |      |      |      |         |  |  |
|                                                                                                      | Farmers          | NA   | 233  | 311  | 278  | 245  | 192  | -41     |                                            | Farmers                     | NA | 92 | 123 | 130 | 115 | 99 | 7    |      |      |      |      |      |         |  |  |
|                                                                                                      | Self-employed    | -    | -    | -    | -    | -    | -    | -       |                                            | Self-employed               | -  | -  | -   | -   | -   | -  | -    |      |      |      |      |      |         |  |  |
| Other causes                                                                                         | All population   | NA   | 112  | 102  | 94   | 94   | 87   | -26     | Road traffic accidents<br>(V01-V98)        | All population              | NA | 16 | 13  | 10  | 6   | 5  | -11  |      |      |      |      |      |         |  |  |
|                                                                                                      | Upper non-manual | NA   | 80   | 123  | 125  | 111  | 80   | 0       |                                            | Upper non-manual            | NA | 10 | 16  | 12  | 7   | 5  | -5   |      |      |      |      |      |         |  |  |
|                                                                                                      | Lower non-manual | NA   | 111  | 88   | 72   | 64   | 65   | -45     |                                            | Lower non-manual            | NA | 14 | 11  | 8   | 5   | 4  | -11  |      |      |      |      |      |         |  |  |
|                                                                                                      | Manual           | NA   | 106  | 76   | 74   | 86   | 89   | -18     |                                            | Manual                      | NA | 20 | 14  | 11  | 8   | 6  | -13  |      |      |      |      |      |         |  |  |
|                                                                                                      | Farmers          | NA   | 295  | 374  | 350  | 350  | 292  | -3      |                                            | Farmers                     | NA | 39 | 36  | 26  | 15  | 12 | -27  |      |      |      |      |      |         |  |  |
|                                                                                                      | Self-employed    | -    | -    | -    | -    | -    | -    | -       |                                            | Self-employed               | -  | -  | -   | -   | -   | -  | -    |      |      |      |      |      |         |  |  |

\*Absolute mortality changes between 1995 and 2015. NA; data not available

**Appendix Table 4-10. Age-standardized all-cause and cause-specific mortality by occupational class, men aged 35-64 in South Korea (per 100,000 person-years)**

| South Korea                         |                  | 1990                        | 1997 | 2000 | 2005 | 2010 | 2015 | Change* |                         |                  | 1990 | 1997 | 2000 | 2005 | 2010 | 2015 | Change* |
|-------------------------------------|------------------|-----------------------------|------|------|------|------|------|---------|-------------------------|------------------|------|------|------|------|------|------|---------|
| <b>All-cause</b>                    |                  | <b>Cause-specific death</b> |      |      |      |      |      |         |                         |                  |      |      |      |      |      |      |         |
| All-cause                           | All population   | 1174                        | 964  | 821  | 637  | 523  | 410  | -555    | Ischemic heart disease  | All population   | NA   | 32   | 38   | 33   | 26   | 21   | -11     |
|                                     | Upper non-manual | 360                         | 377  | 384  | 355  | 479  | 495  | 118     | (I20-I25)               | Upper non-manual | NA   | 20   | 26   | 24   | 30   | 30   | 10      |
|                                     | Lower non-manual | 937                         | 1399 | 1132 | 961  | 751  | 438  | -961    |                         | Lower non-manual | NA   | 68   | 64   | 56   | 41   | 26   | -42     |
|                                     | Manual           | 1011                        | 813  | 542  | 363  | 290  | 297  | -516    |                         | Manual           | NA   | 28   | 26   | 19   | 13   | 15   | -13     |
|                                     | Farmers          | 1753                        | 1388 | 1429 | 1143 | 1067 | 998  | -390    |                         | Farmers          | NA   | 24   | 41   | 38   | 29   | 25   | 1       |
|                                     | Self-employed    | -                           | -    | -    | -    | -    | -    | -       |                         | Self-employed    | -    | -    | -    | -    | -    | -    | -       |
| <b>Broad cause-specific death</b>   |                  |                             |      |      |      |      |      |         |                         |                  |      |      |      |      |      |      |         |
| All cancer<br>(C00-D48)             | All population   | NA                          | 311  | 269  | 222  | 179  | 138  | -173    | Cerebrovascular disease | All population   | NA   | 106  | 85   | 55   | 33   | 25   | -81     |
|                                     | Upper non-manual | NA                          | 153  | 156  | 146  | 190  | 211  | 58      | (I60-I69)               | Upper non-manual | NA   | 42   | 39   | 32   | 32   | 28   | -14     |
|                                     | Lower non-manual | NA                          | 497  | 415  | 384  | 283  | 169  | -328    |                         | Lower non-manual | NA   | 154  | 112  | 79   | 45   | 28   | -126    |
|                                     | Manual           | NA                          | 234  | 144  | 96   | 73   | 79   | -155    |                         | Manual           | NA   | 84   | 52   | 31   | 18   | 18   | -66     |
|                                     | Farmers          | NA                          | 391  | 397  | 313  | 267  | 246  | -145    |                         | Farmers          | NA   | 129  | 124  | 72   | 47   | 41   | -87     |
|                                     | Self-employed    | -                           | -    | -    | -    | -    | -    | -       |                         | Self-employed    | -    | -    | -    | -    | -    | -    | -       |
| Cardiovascular disease<br>(I00-I99) | All population   | NA                          | 191  | 156  | 110  | 79   | 65   | -126    | Smoking-related causes  | All population   | NA   | 69   | 64   | 51   | 39   | 30   | -40     |
|                                     | Upper non-manual | NA                          | 76   | 74   | 65   | 75   | 80   | 5       | (C32-34, J40-44, J47)   | Upper non-manual | NA   | 27   | 28   | 30   | 45   | 43   | 16      |
|                                     | Lower non-manual | NA                          | 297  | 235  | 174  | 118  | 75   | -222    |                         | Lower non-manual | NA   | 95   | 85   | 75   | 49   | 34   | -61     |
|                                     | Manual           | NA                          | 152  | 97   | 65   | 43   | 46   | -106    |                         | Manual           | NA   | 49   | 35   | 23   | 15   | 16   | -33     |
|                                     | Farmers          | NA                          | 241  | 221  | 141  | 108  | 111  | -130    |                         | Farmers          | NA   | 96   | 103  | 76   | 60   | 54   | -42     |
|                                     | Self-employed    | -                           | -    | -    | -    | -    | -    | -       |                         | Self-employed    | -    | -    | -    | -    | -    | -    | -       |
| External causes<br>(V01-Y98)        | All population   | NA                          | 163  | 135  | 125  | 116  | 87   | -76     | Suicide                 | All population   | NA   | 30   | 32   | 50   | 57   | 48   | 17      |
|                                     | Upper non-manual | NA                          | 57   | 56   | 65   | 98   | 96   | 38      | (X60-X84, Y87.0)        | Upper non-manual | NA   | 9    | 12   | 31   | 60   | 61   | 52      |
|                                     | Lower non-manual | NA                          | 200  | 157  | 162  | 145  | 85   | -115    |                         | Lower non-manual | NA   | 40   | 40   | 74   | 82   | 55   | 15      |
|                                     | Manual           | NA                          | 185  | 124  | 99   | 85   | 76   | -110    |                         | Manual           | NA   | 34   | 26   | 33   | 33   | 39   | 5       |
|                                     | Farmers          | NA                          | 266  | 308  | 303  | 307  | 246  | -20     |                         | Farmers          | NA   | 54   | 86   | 118  | 123  | 83   | 30      |
|                                     | Self-employed    | -                           | -    | -    | -    | -    | -    | -       |                         | Self-employed    | -    | -    | -    | -    | -    | -    | -       |
| Other causes                        | All population   | NA                          | 299  | 260  | 180  | 150  | 119  | -181    | Road traffic accidents  | All population   | NA   | 72   | 53   | 32   | 24   | 16   | -57     |
|                                     | Upper non-manual | NA                          | 91   | 97   | 79   | 116  | 108  | 17      | (V01-V89, Y85)          | Upper non-manual | NA   | 26   | 23   | 14   | 19   | 17   | -9      |
|                                     | Lower non-manual | NA                          | 406  | 326  | 241  | 205  | 109  | -297    |                         | Lower non-manual | NA   | 92   | 63   | 42   | 28   | 15   | -77     |
|                                     | Manual           | NA                          | 242  | 176  | 103  | 89   | 96   | -145    |                         | Manual           | NA   | 74   | 47   | 25   | 18   | 13   | -61     |
|                                     | Farmers          | NA                          | 490  | 504  | 386  | 384  | 395  | -95     |                         | Farmers          | NA   | 124  | 121  | 92   | 72   | 56   | -68     |
|                                     | Self-employed    | -                           | -    | -    | -    | -    | -    | -       |                         | Self-employed    | -    | -    | -    | -    | -    | -    | -       |

\*Absolute mortality changes between 1997 and 2015. NA; data not available



**Appendix Table 4-11. Age-standardized mortality rate difference (RD as compared to upper non-manual worker, by countries: observation period: 2010-2014 (2005-2009\*, 2015†))**

|                      | Finland      |               |                 |                           |                             | Italy(Turin)*      |                      |                 |                   |                  | Denmark              |                  |                           |                             |                    | Estonia              |                 |                   |               |                  | England/Wales   |                           |                             |                    |                      | Lithuania       |                   |              |               |                 | France*                   |                             |                    |                      |                 | Japan†            |              |               |                 |                           | Switzerland                 |                    |                      |                 |                   | South Korea† |  |  |  |  |
|----------------------|--------------|---------------|-----------------|---------------------------|-----------------------------|--------------------|----------------------|-----------------|-------------------|------------------|----------------------|------------------|---------------------------|-----------------------------|--------------------|----------------------|-----------------|-------------------|---------------|------------------|-----------------|---------------------------|-----------------------------|--------------------|----------------------|-----------------|-------------------|--------------|---------------|-----------------|---------------------------|-----------------------------|--------------------|----------------------|-----------------|-------------------|--------------|---------------|-----------------|---------------------------|-----------------------------|--------------------|----------------------|-----------------|-------------------|--------------|--|--|--|--|
|                      | All-cause RD | All cancer RD | All cancer (%)‡ | Cardiovascular disease RD | Cardiovascular disease (%)‡ | External causes RD | External causes (%)‡ | Other causes RD | Other causes (%)‡ | All-cause RD     | All cancer RD        | All cancer (%)‡  | Cardiovascular disease RD | Cardiovascular disease (%)‡ | External causes RD | External causes (%)‡ | Other causes RD | Other causes (%)‡ | All-cause RD  | All cancer RD    | All cancer (%)‡ | Cardiovascular disease RD | Cardiovascular disease (%)‡ | External causes RD | External causes (%)‡ | Other causes RD | Other causes (%)‡ | All-cause RD | All cancer RD | All cancer (%)‡ | Cardiovascular disease RD | Cardiovascular disease (%)‡ | External causes RD | External causes (%)‡ | Other causes RD | Other causes (%)‡ | All-cause RD | All cancer RD | All cancer (%)‡ | Cardiovascular disease RD | Cardiovascular disease (%)‡ | External causes RD | External causes (%)‡ | Other causes RD | Other causes (%)‡ |              |  |  |  |  |
| <b>Finland</b>       |              |               |                 |                           |                             |                    |                      |                 |                   |                  | <b>Italy(Turin)*</b> |                  |                           |                             |                    |                      |                 |                   |               |                  |                 |                           |                             |                    |                      |                 |                   |              |               |                 |                           |                             |                    |                      |                 |                   |              |               |                 |                           |                             |                    |                      |                 |                   |              |  |  |  |  |
| Upper non-manual     | 0            |               |                 |                           |                             |                    |                      |                 |                   |                  |                      | Upper non-manual | 0                         |                             |                    |                      |                 |                   |               |                  |                 |                           |                             |                    |                      |                 |                   |              |               |                 |                           |                             |                    |                      |                 |                   |              |               |                 |                           |                             |                    |                      |                 |                   |              |  |  |  |  |
| Lower non-manual     | 168          | 33            | (20)            | 43                        | (25)                        | 36                 | (22)                 | 56              | (33)              | Lower non-manual | 39                   | 3                | (9)                       | 6                           | (16)               | 5                    | (14)            | 24                | (62)          | Lower non-manual | 376             | 88                        | (23)                        | 142                | (38)                 | 86              | (23)              | 61           | (16)          |                 |                           |                             |                    |                      |                 |                   |              |               |                 |                           |                             |                    |                      |                 |                   |              |  |  |  |  |
| Manual               | 392          | 63            | (16)            | 123                       | (31)                        | 87                 | (22)                 | 119             | (30)              | Manual           | 155                  | 65               | (42)                      | 25                          | (16)               | 17                   | (11)            | 49                | (31)          | Manual           | 594             | 115                       | (19)                        | 211                | (35)                 | 143             | (24)              | 126          | (21)          |                 |                           |                             |                    |                      |                 |                   |              |               |                 |                           |                             |                    |                      |                 |                   |              |  |  |  |  |
| Farmers              | 221          | 10            | (4)             | 74                        | (34)                        | 73                 | (33)                 | 63              | (29)              | Farmers          | 421                  | 166              | (32)                      | 307                         | (58)               | -17                  | (3)             | -36               | (7)           | Farmers          | 337             | 50                        | (15)                        | 59                 | (18)                 | 142             | (42)              | 86           | (25)          |                 |                           |                             |                    |                      |                 |                   |              |               |                 |                           |                             |                    |                      |                 |                   |              |  |  |  |  |
| Self-employed        | 154          | 32            | (21)            | 40                        | (26)                        | 42                 | (27)                 | 40              | (26)              | Self-employed    | 142                  | 60               | (42)                      | 21                          | (15)               | 15                   | (10)            | 46                | (32)          | Self-employed    | -               | -                         | -                           | -                  | -                    | -               | -                 | -            | -             |                 |                           |                             |                    |                      |                 |                   |              |               |                 |                           |                             |                    |                      |                 |                   |              |  |  |  |  |
| <b>Denmark</b>       |              |               |                 |                           |                             |                    |                      |                 |                   |                  | <b>Estonia</b>       |                  |                           |                             |                    |                      |                 |                   |               |                  |                 |                           |                             |                    |                      |                 |                   |              |               |                 |                           |                             |                    |                      |                 |                   |              |               |                 |                           |                             |                    |                      |                 |                   |              |  |  |  |  |
| Upper non-manual     | 0            |               |                 |                           |                             |                    |                      |                 |                   |                  |                      | Upper non-manual | 0                         |                             |                    |                      |                 |                   |               |                  |                 |                           |                             |                    |                      |                 |                   |              |               |                 |                           |                             |                    |                      |                 |                   |              |               |                 |                           |                             |                    |                      |                 |                   |              |  |  |  |  |
| Lower non-manual     | 237          | 54            | (23)            | 35                        | (15)                        | 22                 | (9)                  | 126             | (53)              | Lower non-manual | 376                  | 88               | (23)                      | 142                         | (38)               | 86                   | (23)            | 61                | (16)          | Lower non-manual | 376             | 88                        | (23)                        | 142                | (38)                 | 86              | (23)              | 61           | (16)          |                 |                           |                             |                    |                      |                 |                   |              |               |                 |                           |                             |                    |                      |                 |                   |              |  |  |  |  |
| Manual               | 359          | 81            | (22)            | 59                        | (17)                        | 47                 | (13)                 | 172             | (48)              | Manual           | 594                  | 115              | (19)                      | 211                         | (35)               | 143                  | (24)            | 126               | (21)          | Manual           | 594             | 115                       | (19)                        | 211                | (35)                 | 143             | (24)              | 126          | (21)          |                 |                           |                             |                    |                      |                 |                   |              |               |                 |                           |                             |                    |                      |                 |                   |              |  |  |  |  |
| Farmers              | 698          | 101           | (14)            | 115                       | (16)                        | 92                 | (13)                 | 391             | (56)              | Farmers          | 337                  | 50               | (15)                      | 59                          | (18)               | 142                  | (42)            | 86                | (25)          | Farmers          | 337             | 50                        | (15)                        | 59                 | (18)                 | 142             | (42)              | 86           | (25)          |                 |                           |                             |                    |                      |                 |                   |              |               |                 |                           |                             |                    |                      |                 |                   |              |  |  |  |  |
| Self-employed        | -74          | -23           | (32)            | -11                       | (15)                        | -6                 | (8)                  | -33             | (45)              | Self-employed    | -                    | -                | -                         | -                           | -                  | -                    | -               | -                 | Self-employed | -                | -               | -                         | -                           | -                  | -                    | -               | -                 | -            |               |                 |                           |                             |                    |                      |                 |                   |              |               |                 |                           |                             |                    |                      |                 |                   |              |  |  |  |  |
| <b>England/Wales</b> |              |               |                 |                           |                             |                    |                      |                 |                   |                  | <b>Lithuania</b>     |                  |                           |                             |                    |                      |                 |                   |               |                  |                 |                           |                             |                    |                      |                 |                   |              |               |                 |                           |                             |                    |                      |                 |                   |              |               |                 |                           |                             |                    |                      |                 |                   |              |  |  |  |  |
| Upper non-manual     | 0            |               |                 |                           |                             |                    |                      |                 |                   |                  |                      | Upper non-manual | 0                         |                             |                    |                      |                 |                   |               |                  |                 |                           |                             |                    |                      |                 |                   |              |               |                 |                           |                             |                    |                      |                 |                   |              |               |                 |                           |                             |                    |                      |                 |                   |              |  |  |  |  |
| Lower non-manual     | 50           | -5            | (7)             | 32                        | (46)                        | -4                 | (6)                  | 28              | (40)              | Lower non-manual | 353                  | 86               | (25)                      | 116                         | (33)               | 58                   | (16)            | 92                | (26)          | Lower non-manual | 353             | 86                        | (25)                        | 116                | (33)                 | 58              | (16)              | 92           | (26)          |                 |                           |                             |                    |                      |                 |                   |              |               |                 |                           |                             |                    |                      |                 |                   |              |  |  |  |  |
| Manual               | 167          | 40            | (24)            | 46                        | (27)                        | 12                 | (7)                  | 69              | (41)              | Manual           | 1001                 | 167              | (17)                      | 271                         | (27)               | 199                  | (20)            | 364               | (36)          | Manual           | 1001            | 167                       | (17)                        | 271                | (27)                 | 199             | (20)              | 364          | (36)          |                 |                           |                             |                    |                      |                 |                   |              |               |                 |                           |                             |                    |                      |                 |                   |              |  |  |  |  |
| Farmers              | -            | -             | -               | -                         | -                           | -                  | -                    | -               | -                 | Farmers          | 336                  | 79               | (23)                      | 55                          | (16)               | 141                  | (42)            | 61                | (18)          | Farmers          | 336             | 79                        | (23)                        | 55                 | (16)                 | 141             | (42)              | 61           | (18)          |                 |                           |                             |                    |                      |                 |                   |              |               |                 |                           |                             |                    |                      |                 |                   |              |  |  |  |  |
| Self-employed        | 49           | 21            | (43)            | 2                         | (4)                         | 21                 | (44)                 | 4               | (9)               | Self-employed    | -93                  | -29              | (21)                      | -52                         | (38)               | 22                   | (16)            | -35               | (25)          | Self-employed    | -93             | -29                       | (21)                        | -52                | (38)                 | 22              | (16)              | -35          | (25)          |                 |                           |                             |                    |                      |                 |                   |              |               |                 |                           |                             |                    |                      |                 |                   |              |  |  |  |  |
| <b>France*</b>       |              |               |                 |                           |                             |                    |                      |                 |                   |                  | <b>Japan†</b>        |                  |                           |                             |                    |                      |                 |                   |               |                  |                 |                           |                             |                    |                      |                 |                   |              |               |                 |                           |                             |                    |                      |                 |                   |              |               |                 |                           |                             |                    |                      |                 |                   |              |  |  |  |  |
| Upper non-manual     | 0            |               |                 |                           |                             |                    |                      |                 |                   |                  |                      | Upper non-manual | 0                         |                             |                    |                      |                 |                   |               |                  |                 |                           |                             |                    |                      |                 |                   |              |               |                 |                           |                             |                    |                      |                 |                   |              |               |                 |                           |                             |                    |                      |                 |                   |              |  |  |  |  |
| Lower non-manual     | 308          | 81            | (26)            | 47                        | (15)                        | 42                 | (14)                 | 139             | (45)              | Lower non-manual | -99                  | -47              | (48)                      | -22                         | (23)               | -14                  | (14)            | -15               | (15)          | Lower non-manual | -99             | -47                       | (48)                        | -22                | (23)                 | -14             | (14)              | -15          | (15)          |                 |                           |                             |                    |                      |                 |                   |              |               |                 |                           |                             |                    |                      |                 |                   |              |  |  |  |  |
| Manual               | 385          | 141           | (37)            | 69                        | (18)                        | 57                 | (15)                 | 118             | (30)              | Manual           | -19                  | -29              | (75)                      | 0                           | (0)                | 1                    | (3)             | 9                 | (22)          | Manual           | -19             | -29                       | (75)                        | 0                  | (0)                  | 1               | (3)               | 9            | (22)          |                 |                           |                             |                    |                      |                 |                   |              |               |                 |                           |                             |                    |                      |                 |                   |              |  |  |  |  |
| Farmers              | 24           | -40           | (39)            | 34                        | (32)                        | 22                 | (21)                 | 8               | (8)               | Farmers          | 559                  | 88               | (16)                      | 118                         | (21)               | 142                  | (25)            | 211               | (38)          | Farmers          | 559             | 88                        | (16)                        | 118                | (21)                 | 142             | (25)              | 211          | (38)          |                 |                           |                             |                    |                      |                 |                   |              |               |                 |                           |                             |                    |                      |                 |                   |              |  |  |  |  |
| Self-employed        | 55           | -5            | (7)             | 30                        | (46)                        | 18                 | (28)                 | 11              | (18)              | Self-employed    | -                    | -                | -                         | -                           | -                  | -                    | -               | -                 | Self-employed | -                | -               | -                         | -                           | -                  | -                    | -               | -                 | -            |               |                 |                           |                             |                    |                      |                 |                   |              |               |                 |                           |                             |                    |                      |                 |                   |              |  |  |  |  |
| <b>Switzerland</b>   |              |               |                 |                           |                             |                    |                      |                 |                   |                  | <b>South Korea†</b>  |                  |                           |                             |                    |                      |                 |                   |               |                  |                 |                           |                             |                    |                      |                 |                   |              |               |                 |                           |                             |                    |                      |                 |                   |              |               |                 |                           |                             |                    |                      |                 |                   |              |  |  |  |  |
| Upper non-manual     | 0            |               |                 |                           |                             |                    |                      |                 |                   |                  |                      | Upper non-manual | 0                         |                             |                    |                      |                 |                   |               |                  |                 |                           |                             |                    |                      |                 |                   |              |               |                 |                           |                             |                    |                      |                 |                   |              |               |                 |                           |                             |                    |                      |                 |                   |              |  |  |  |  |
| Lower non-manual     | 182          | 40            | (22)            | 36                        | (20)                        | 16                 | (9)                  | 91              | (50)              | Lower non-manual | -57                  | -43              | (71)                      | -5                          | (9)                | -11                  | (18)            | 1                 | (2)           | Lower non-manual | -57             | -43                       | (71)                        | -5                 | (9)                  | -11             | (18)              | 1            | (2)           |                 |                           |                             |                    |                      |                 |                   |              |               |                 |                           |                             |                    |                      |                 |                   |              |  |  |  |  |
| Manual               | 284          | 87            | (31)            | 62                        | (22)                        | 35                 | (12)                 | 99              | (35)              | Manual           | -199                 | -133             | (67)                      | -34                         | (17)               | -20                  | (10)            | -12               | (6)           | Manual           | -199            | -133                      | (67)                        | -34                | (17)                 | -20             | (10)              | -12          | (6)           |                 |                           |                             |                    |                      |                 |                   |              |               |                 |                           |                             |                    |                      |                 |                   |              |  |  |  |  |
| Farmers              | 95           | 11            | (12)            | 39                        | (41)                        | 35                 | (37)                 | 10              | (10)              | Farmers          | 502                  | 35               | (7)                       | 31                          | (6)                | 150                  | (30)            | 287               | (57)          | Farmers          | 502             | 35                        | (7)                         | 31                 | (6)                  | 150             | (30)              | 287          | (57)          |                 |                           |                             |                    |                      |                 |                   |              |               |                 |                           |                             |                    |                      |                 |                   |              |  |  |  |  |
| Self-employed        | 53           | 19            | (37)            | 15                        | (28)                        | 6                  | (12)                 | 12              | (23)              | Self-employed    | -                    | -                | -                         | -                           | -                  | -                    | -               | -                 | Self-employed | -                | -               | -                         | -                           | -                  | -                    | -               | -                 | -            |               |                 |                           |                             |                    |                      |                 |                   |              |               |                 |                           |                             |                    |                      |                 |                   |              |  |  |  |  |

§ Rate difference (RD) was calculated using direct method with European standard population.

‡ Percentage (%)= $\frac{RD_{\text{cause-specific}}}{(|RD_{\text{all cancer}}|+|RD_{\text{cardiovascular disease}}|+|RD_{\text{external causes}}|+|RD_{\text{other causes}}|)}$

(A) 1990-1994

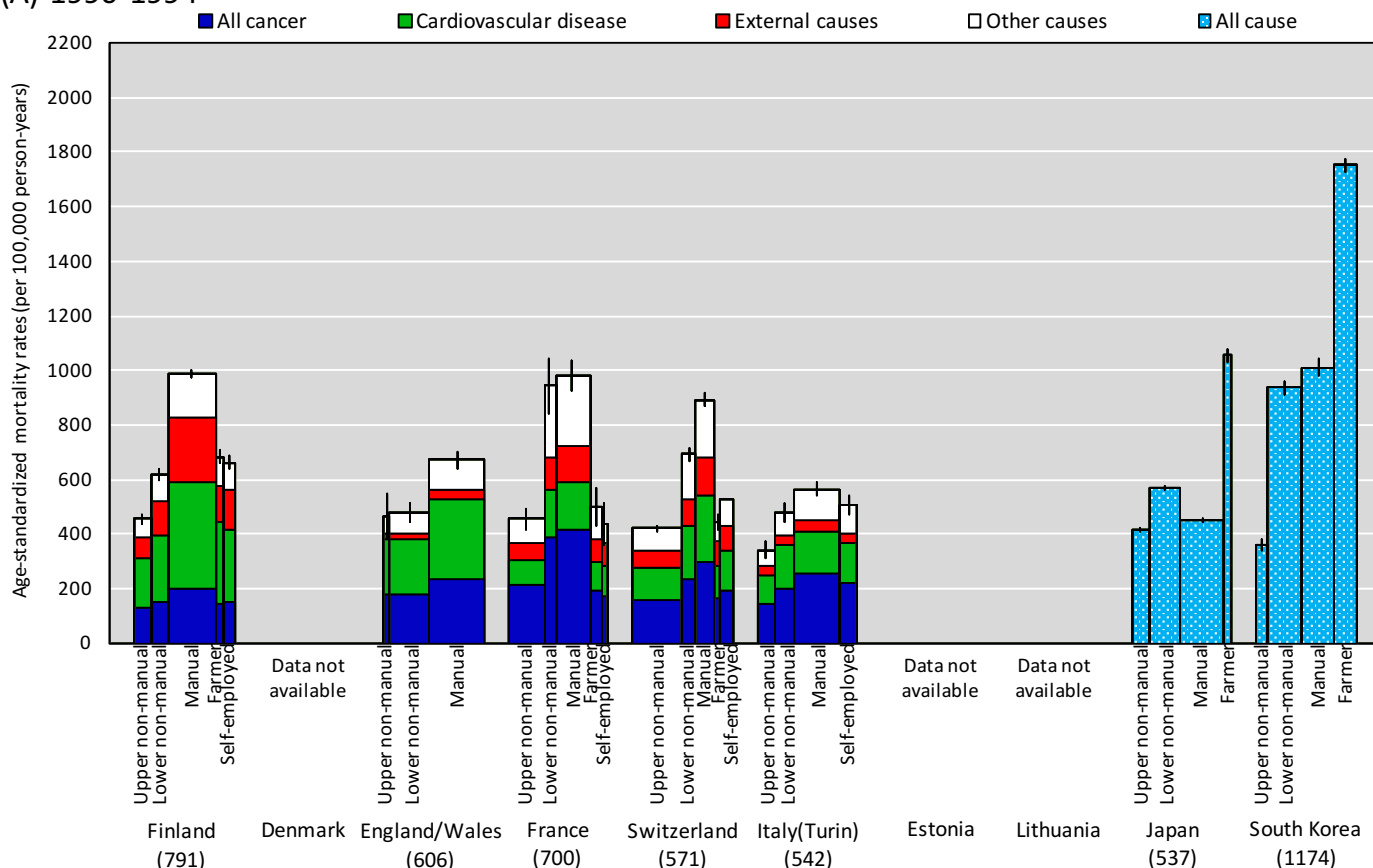

(B) 1995-1999

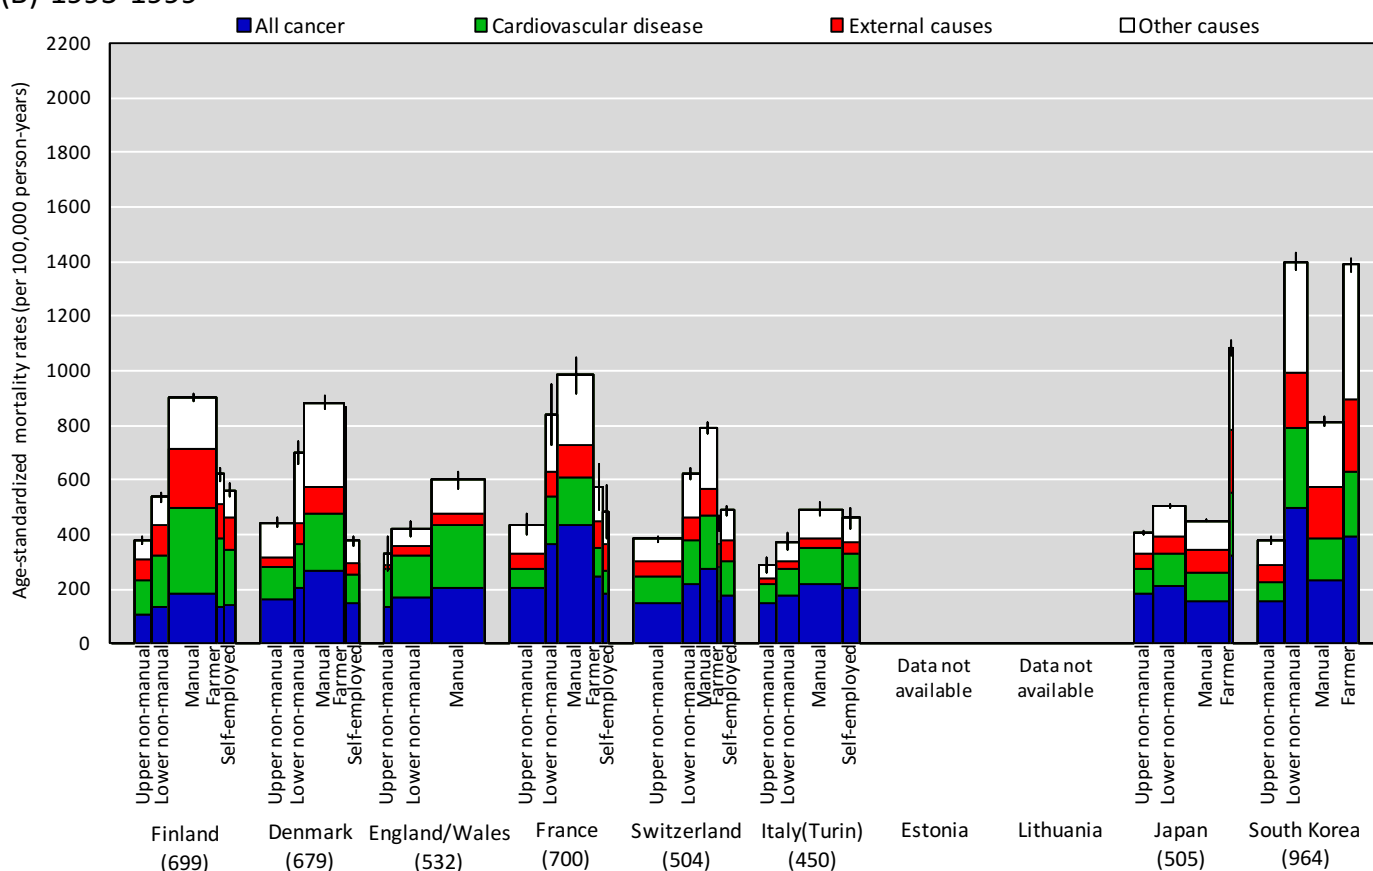

**Appendix Figure 4-1. Male age-standardized mortality rate and population distribution by occupational class among 8 European countries, Japan, and South Korea by study period: number in parentheses indicate the whole population mortality rate (per 100,000 person-years): after applying correction factor**



(E) 2010-2014

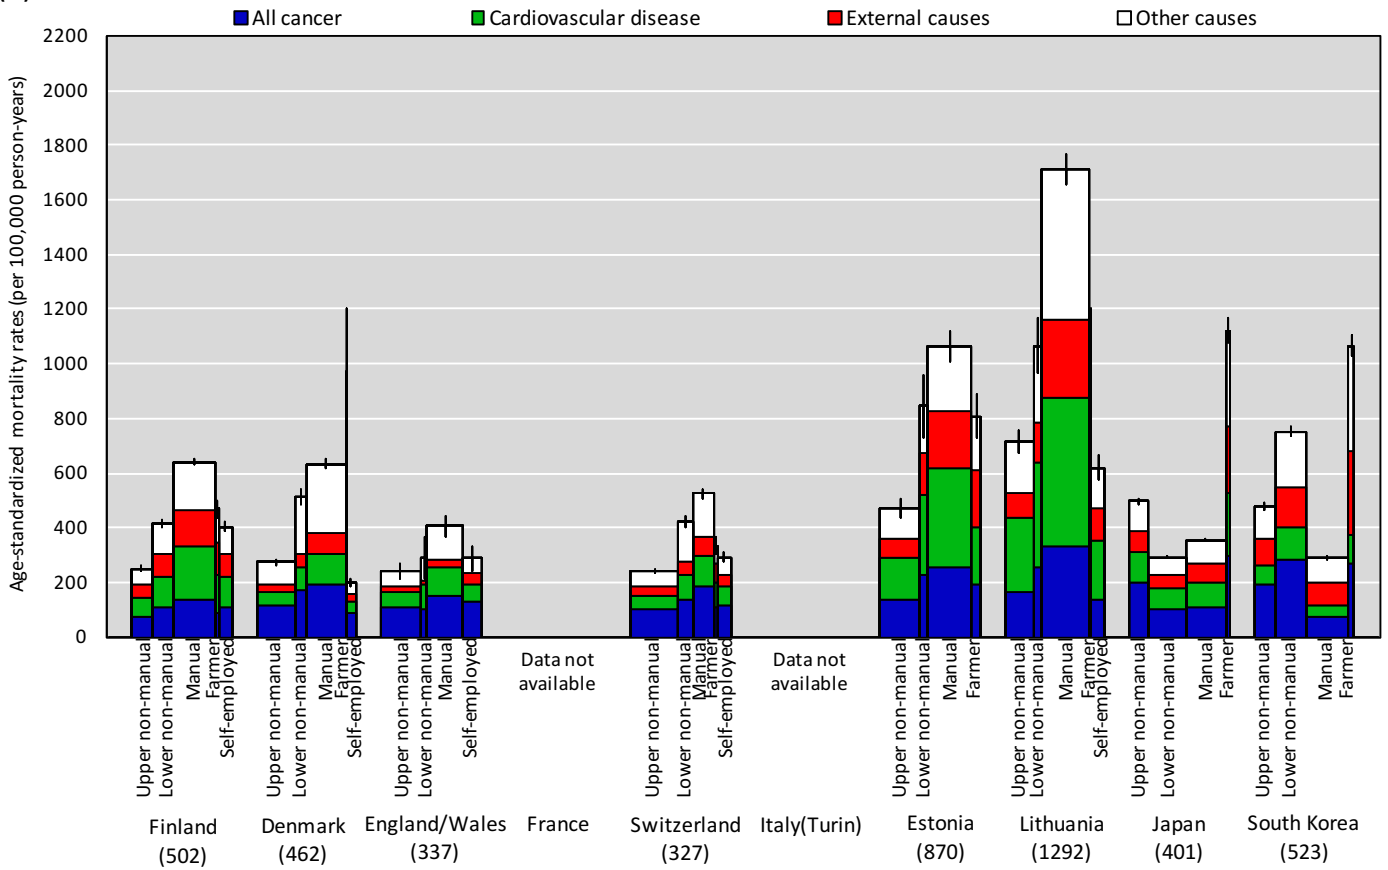

(F) 2015

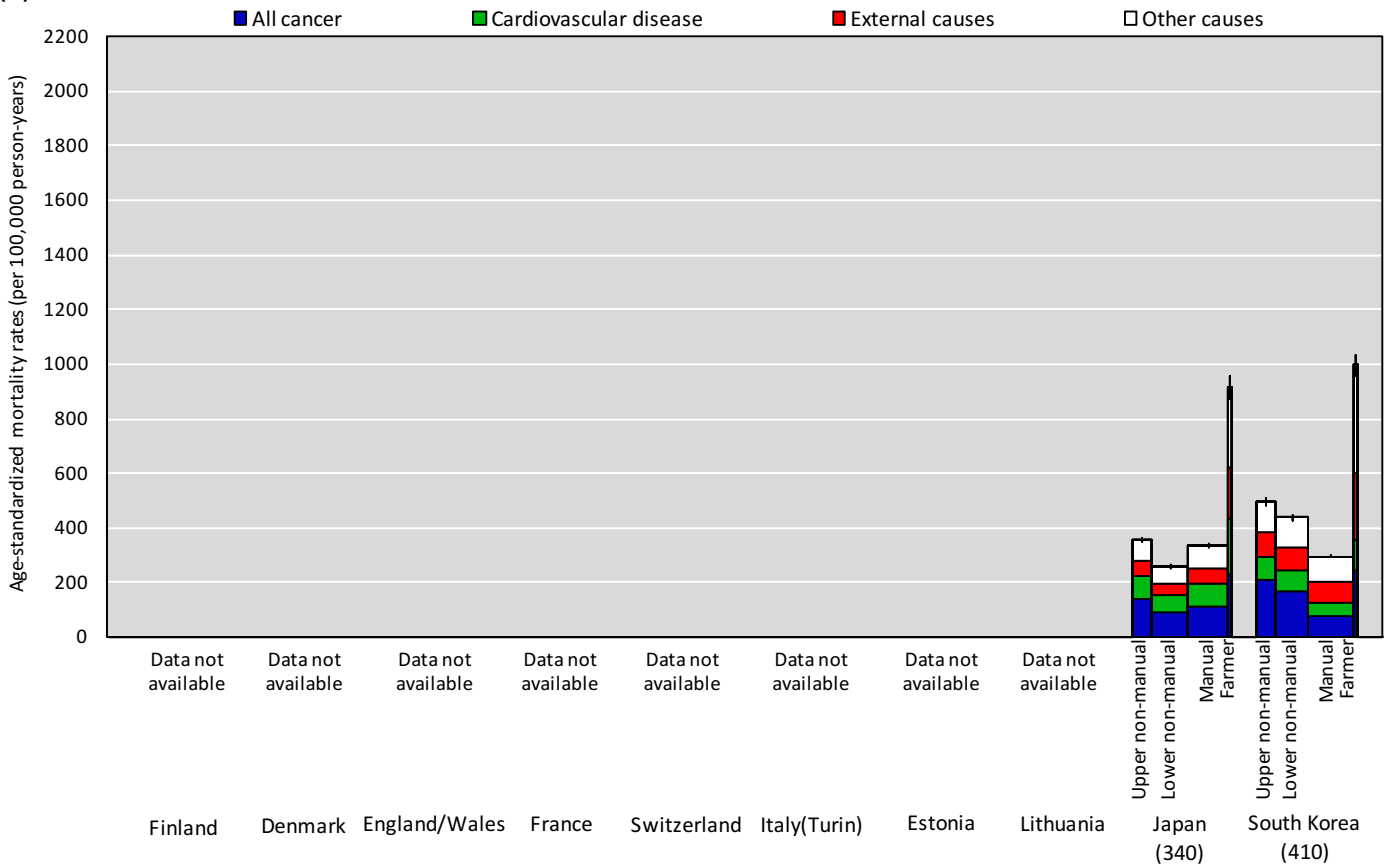

Appendix Figure 4-1. Continued

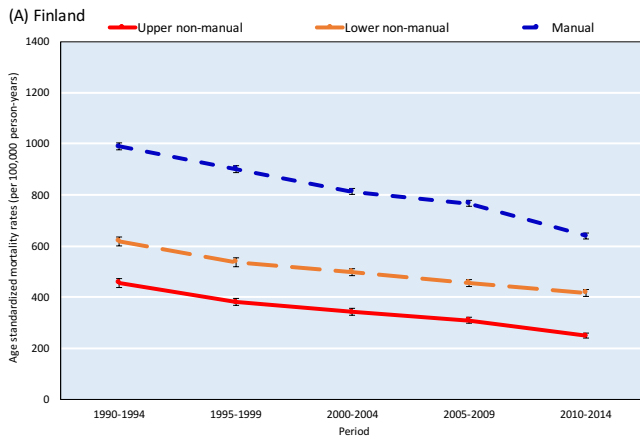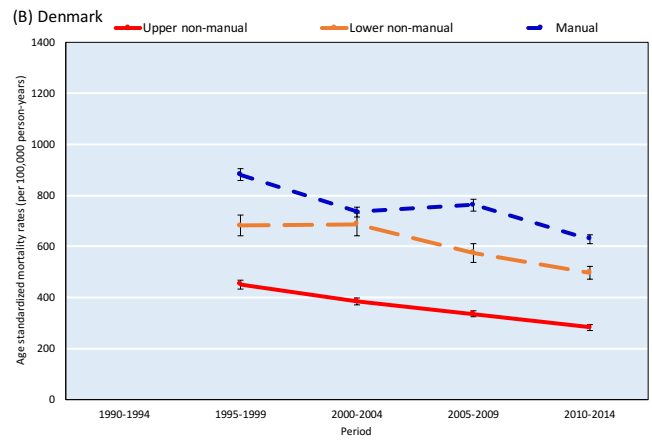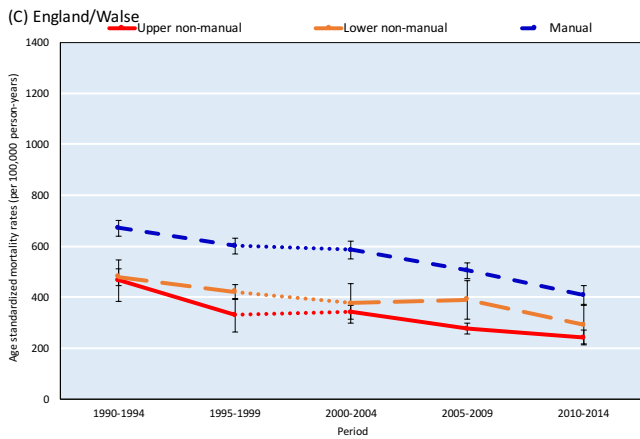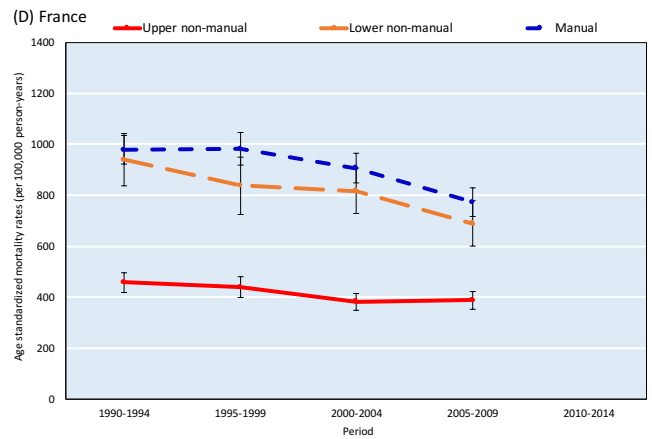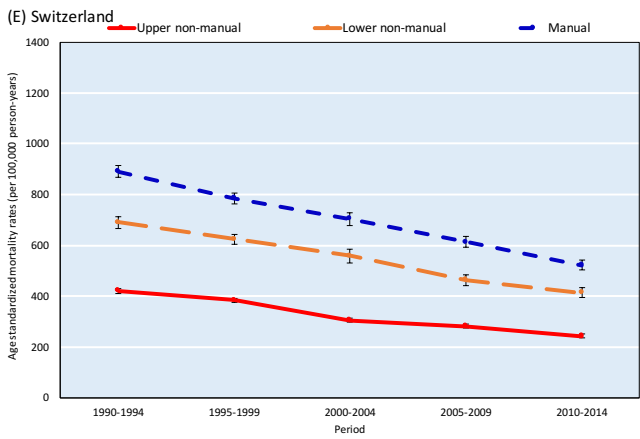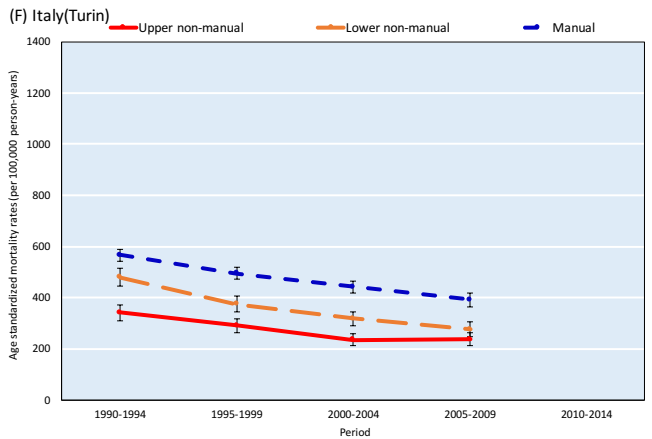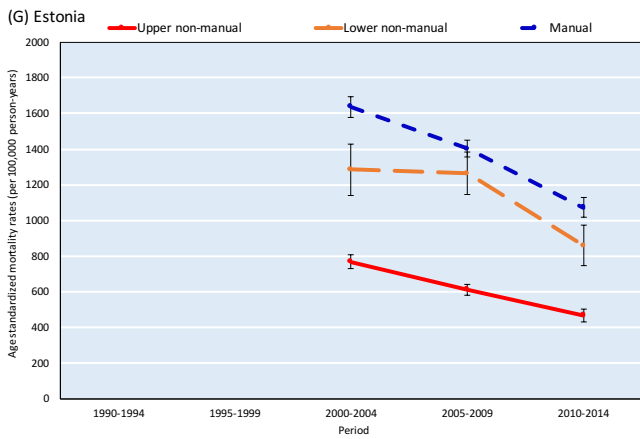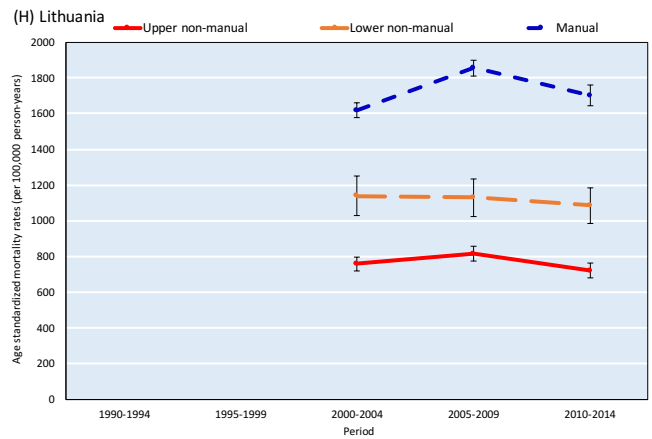

**Appendix Figure 4-2. Trends in male age-standardized all-cause mortality rate by occupational class (upper non-manual, lower non-manual, and manual workers): after applying correction factor**

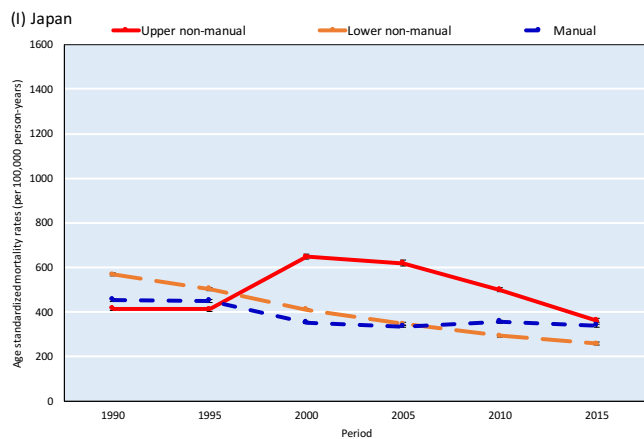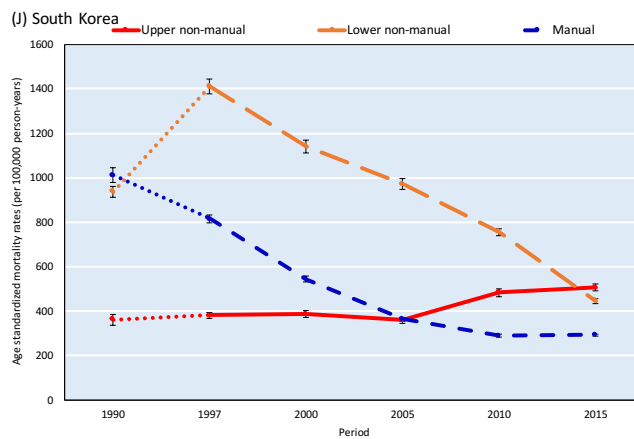

Appendix Figure 4-2. Continued

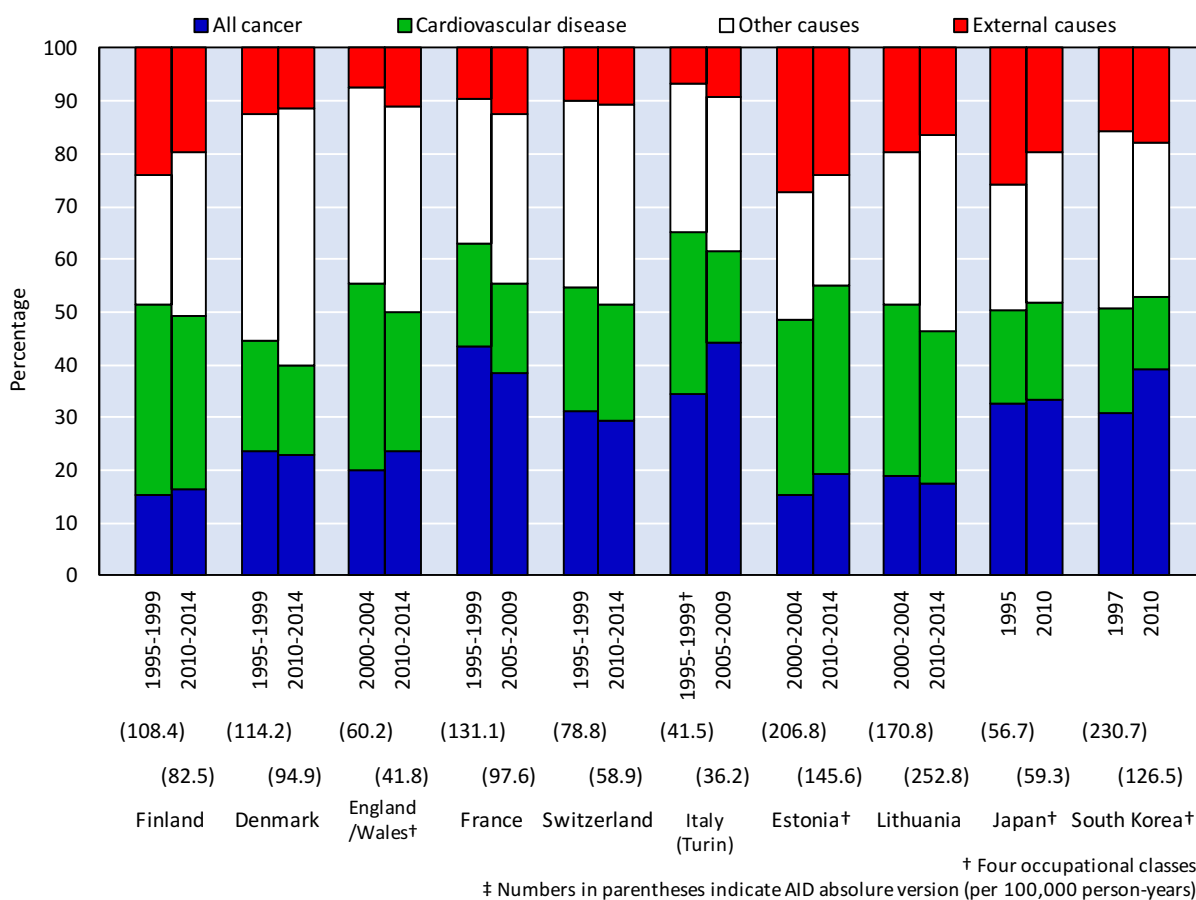

Appendix Figure 4-3. Changes in broad cause-specific contribution to inequality (%) among five occupational class estimated by average inter-group difference (AID absolute version)

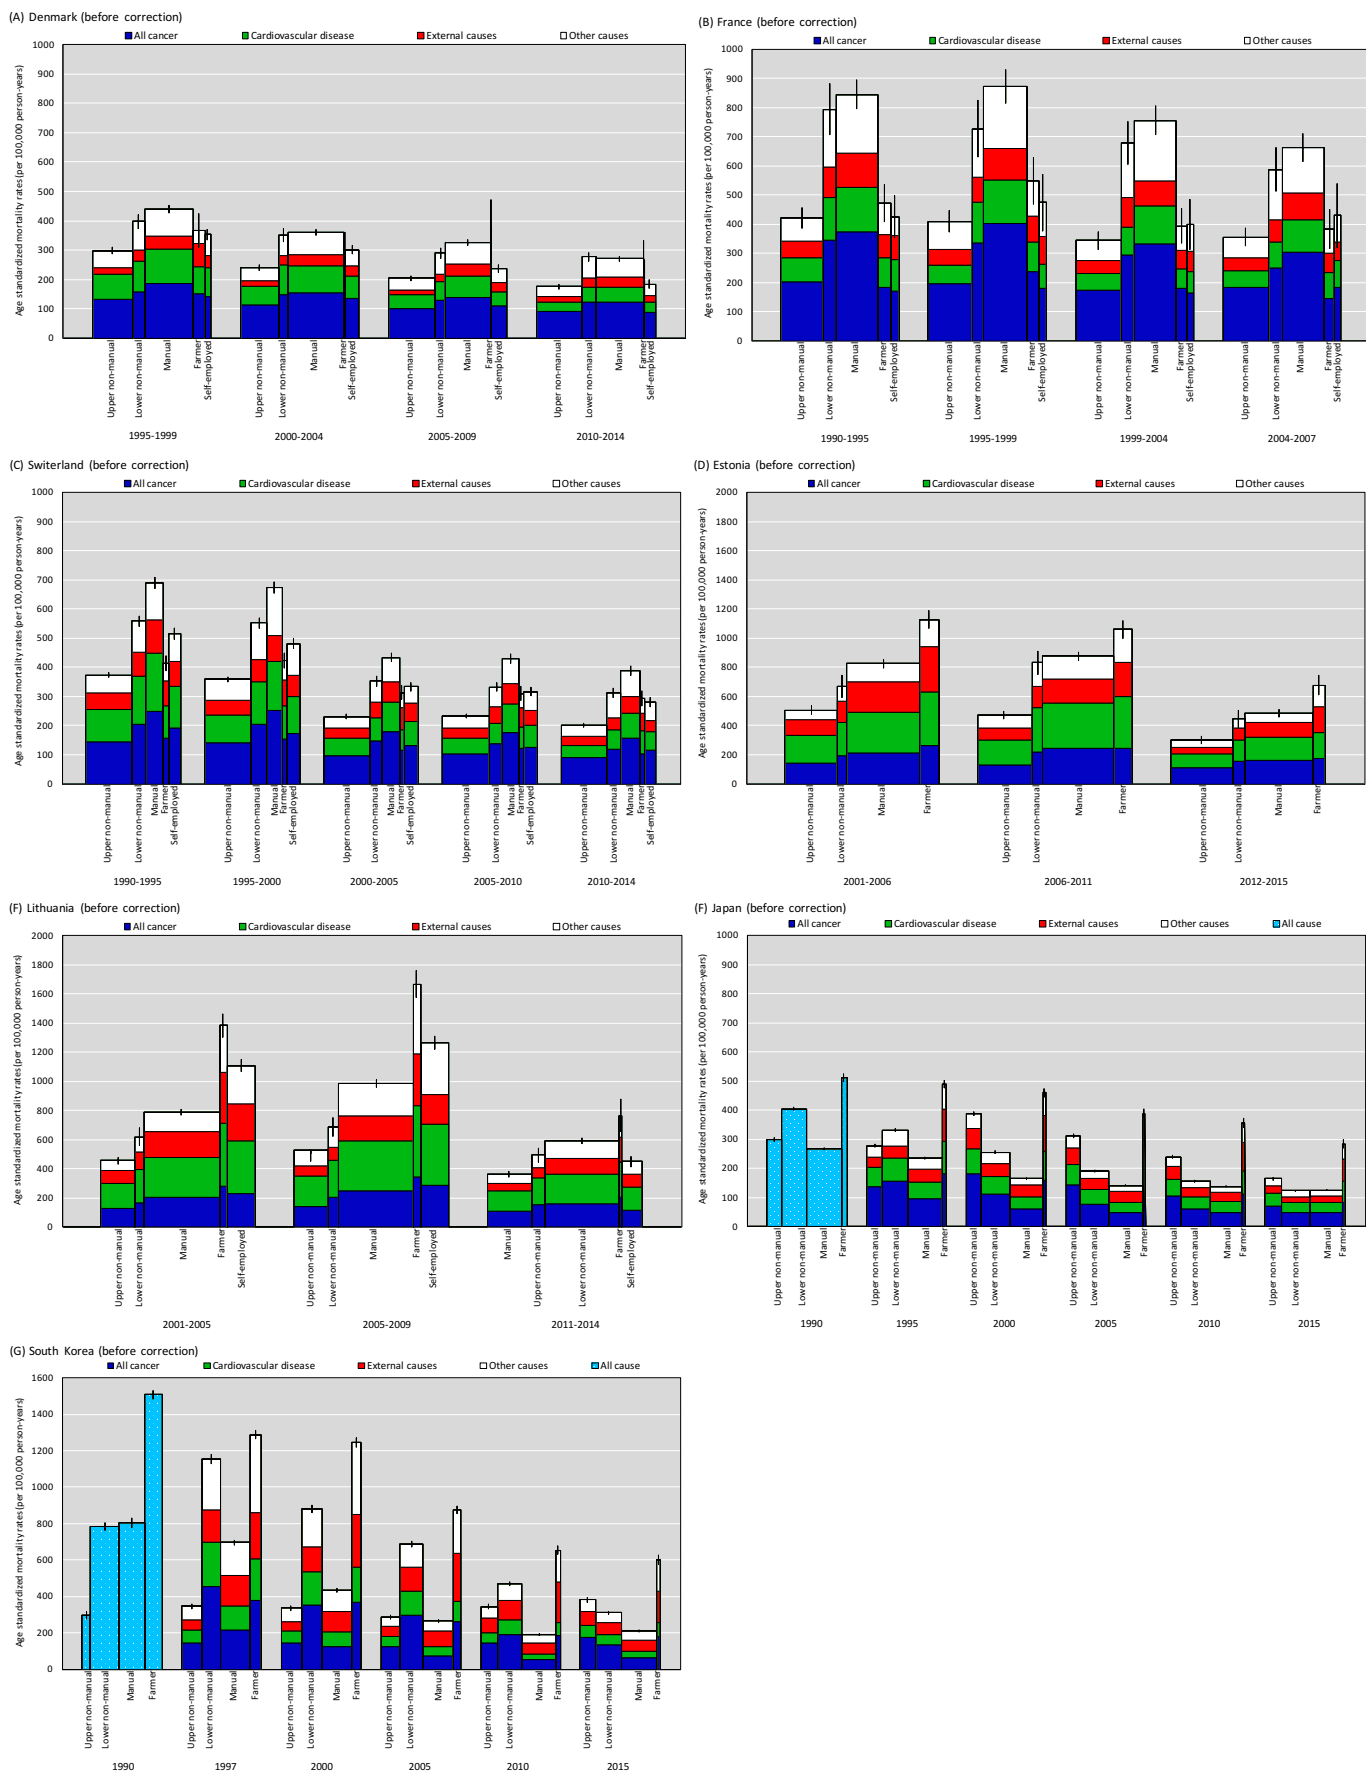

**Appendix Figure 4-4. Age-standardized mortality rate and contribution of cause-specific death among men aged 35-64 by countries (before applying correction factor)**

## Appendix 5 – Sensitivity analysis using an indirect estimation of mortality among the self-employed in Japan and South Korea

Employment status (employed versus self-employed) is not registered on the death certificate in Japan and South Korea, and it was therefore impossible to calculate mortality rates for the self-employed in these two countries, in contrast to most European countries where the self-employed could be distinguished as a separate occupational class. Because this could have biased our results, we conducted a sensitivity analysis, in which we indirectly estimated the mortality rates for the self-employed in Japan and South Korea, and removed the estimated numbers of deaths and person-years of the self-employed in Japan and South Korea from the other occupational classes. We also re-estimated the average inter-group difference (AID absolute and relative version) for five occupational class (upper non-manual, lower non-manual, manual, farmer, and self-employed) using the new estimates for Japan and South Korea. In order to estimate mortality among the self-employed in Japan and South Korea, we proceeded as follows;

1. Percentages of self-employed by occupational class in Japan and South Korea were obtained from the census (in contrast to the death certificate, the census did register employment status; shown in Appendix Table 2-3). These percentages were used to estimate population numbers and person-years for the self-employed in Japan and South Korea, and these were then subtracted from the person-years for the other occupational classes.
2. We estimated the rate ratio of mortality among the self-employed as compared to the whole population in European countries from the available datasets (Appendix Table 5-1). This showed that this rate ratio has an average value of around 0.80. We assumed that the same rate ratio applies in Japan and South Korea.
3. We re-estimated mortality by occupational class using the results of steps 1 and 2 as follows;

$$\text{Modified mortality rate}_z = \frac{(\text{Observed mortality rate}_z - 0.8 * \text{mortality rate}_{\text{all population}} * \text{proportion}_{z,\text{self-employed}})}{1 - \text{proportion}_{z,\text{self-employed}}} \quad (\text{A-5.1})$$

where  $\text{proportion}_{z,\text{self-employed}}$  is proportion of self-employed among occupational class  $z$  (data from Appendix Table 2-3). Here, occupational class  $z$  refers to upper non-manual, lower non-manual, or manual workers (according to the EGP scheme, the occupational class of farmers should include both employed and self-employed farmers).

**Appendix Table 5-1. Rate ratios of mortality among self-employed (with mortality in whole population used as a reference)**

|               | 1990-1994 | 1995-1999 | 2000-2004 | 2005-2009 | 2010-2014 |
|---------------|-----------|-----------|-----------|-----------|-----------|
| Finland       | 0.84      | 0.81      | 0.80      | 0.84      | 0.80      |
| Denmark       | -         | 0.56      | 0.55      | 0.49      | 0.44      |
| England/Wales | -         | -         | -         | 0.91      | 0.86      |
| France        | 0.62      | 0.70      | 0.67      | 0.80      | -         |
| Switzerland   | 0.92      | 0.97      | 0.82      | 0.88      | 0.89      |
| Italy(Turin)  | 0.94      | 1.02      | 0.89      | 1.04      | -         |
| Estonia       | -         | -         | -         | -         | -         |
| Lithuania     | -         | -         | 0.92      | 0.93      | 0.48      |

Appendix Figure 5-1 and 5-2 show that levels and trends of mortality by occupational class in Japan and South Korea, re-estimated using the indirectly estimated mortality among the self-employed, were not essentially different as compared to those presented in the main text of this paper. We also calculated the mortality rates for the self-employed in Japan and South Korea using different rate ratios for their mortality as



compared to the whole population, i.e., 0.6, 1.0, and 1.2 instead of 0.8 (step 2). Although this somewhat changed the levels of mortality by occupational class and the AIDs (absolute and relative version), it did not materially change the trends and patterns of mortality inequalities by occupational class in Japan and South Korea (results not shown). These results indicate that the pattern of mortality inequalities by occupational class in Japan and South Korea, including the higher mortality rate of upper non-manual group, is unlikely to be biased by this difference in occupational class classification.

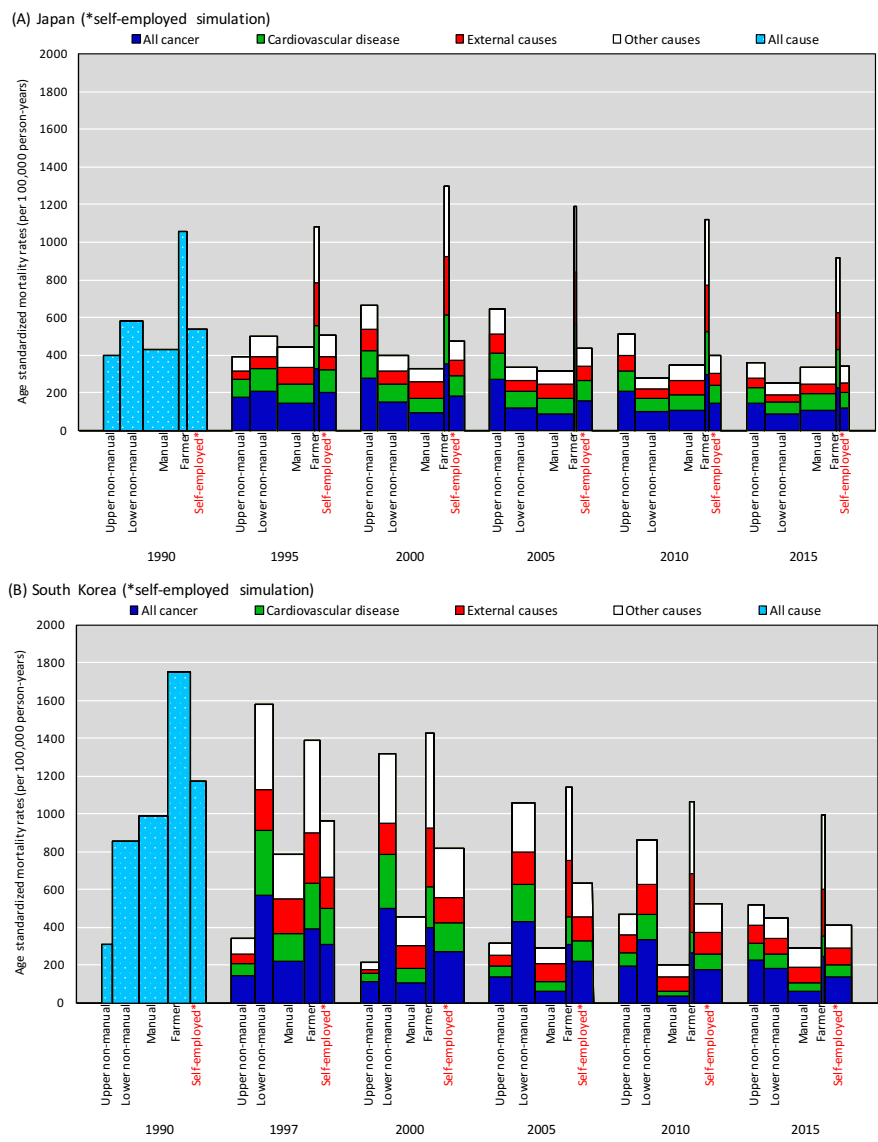

**Appendix Figure 5-1. Mortality by occupational class simulating self-employed mortality in Japan and South Korea**

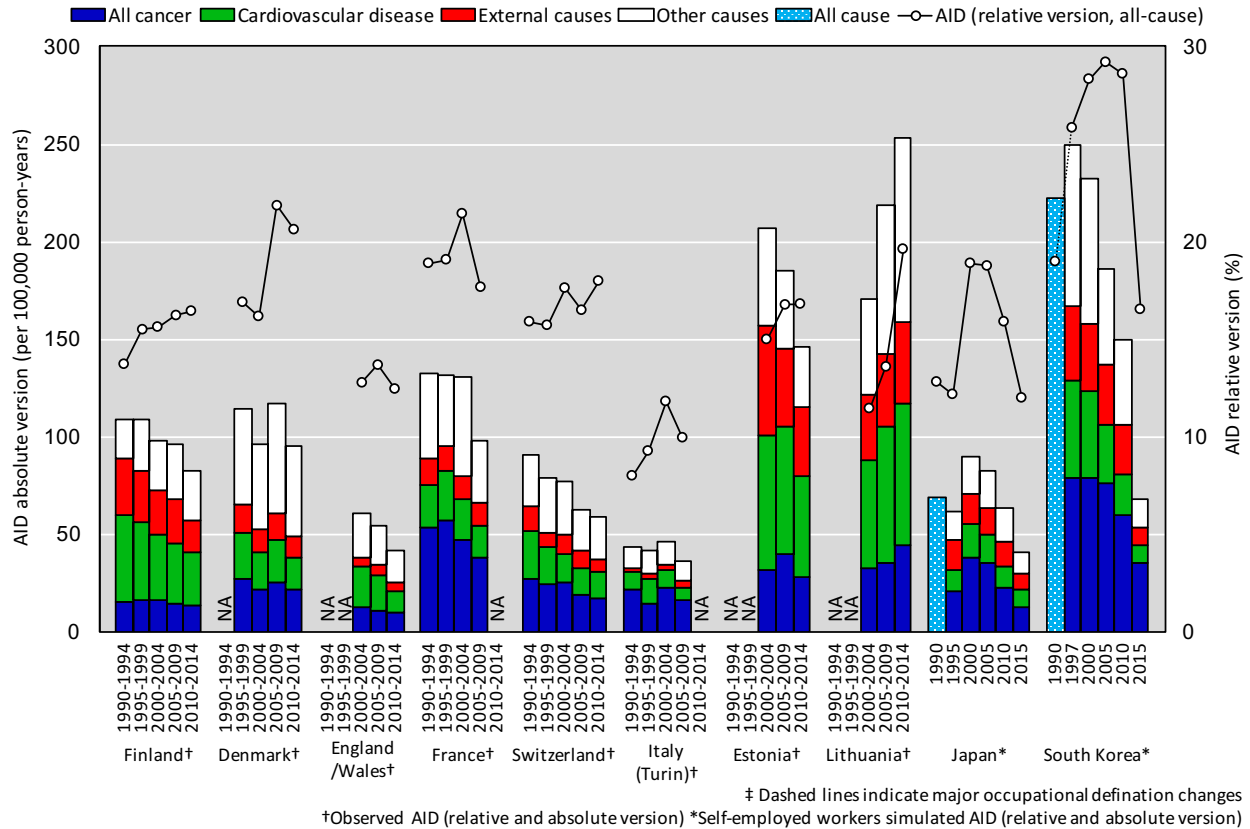

**Appendix Figure 5-2. Changes in absolute and relative mortality inequalities (average inter-group difference: AID absolute and relative version) among five occupational class (upper non-manual, lower non-manual, manual, farmer, and self-employed) assuming self-employed mortality in Japan and South Korea, NA; data not available**
